# Supplementary material for: Ecological indicators of mammal exposure to Ebolavirus
Source: Philos Trans R Soc Lond B Biol Sci. 2019 Aug 12;374(1782):20180337. doi: 10.1098/rstb.2018.0337 (PMC6711296; doi:10.1098/rstb.2018.0337)
Supplement: Supplementary data files [file rstb20180337supp1.xlsx]

## Sheet: Table 1 with negatives.csv
virus	species	Other.primate	Great.ape	Other.bat	Pteropid fruit bat	nonbat	Ab+	Ab tested	PCR+	PCR tested	primer	min_individuals_tested	isolated+	iso attempted indiv	Reference	Notes	Notes	Sampling location	Virus+	Virus_tested	Review Reference	Ab	PCR	Vir	positives	sample	carcass	positive
RESTV	Acerodon_jubatus	0	0	0	1	0	2	56	0	56	RESTV-NP	56			Jayme et al. 2015	Screened 1:1, came back more specifically positive.						56	56	0	2	56	0	1
ZEBOV	Acerodon_jubatus	0	0	0	1	0	1	56				56			Jayme et al. 2015	Screened 1:1, came back more specifically positive.						56	0	0	1	56	0	1
	Allenopithecus_nigroviridis	0	0	0	0	1									Breman et al 1999				0	10	Olson et al. 2012	0	0	10	0	10	0	0
	Allenopithecus_nigroviridis	0	0	0	0	1	0	10				10			Breman 1999						Olson et al. 2012	10	0	0	0	10	0	0
	Anomalurus_derbianus	0	0	0	0	1									Breman et al 1999				0	3	Olson et al. 2012	0	0	3	0	3	0	0
	Anomalurus_derbianus	0	0	0	0	1									Leirs et al 1999				0	1	Olson et al. 2012	0	0	1	0	1	0	0
	Anomalurus_derbianus	0	0	0	0	1	1	3				3			Breman 1999						Olson et al. 2012	3	0	0	1	3	0	1
	Anomalurus_derbianus	0	0	0	0	1	0	4				4			Leirs 1999						Olson et al. 2012	4	0	0	0	4	0	0
	Atherurus_africanus	0	0	0	0	1									Breman et al 1999				0	10	Olson et al. 2012	0	0	10	0	10	0	0
	Atherurus_africanus	0	0	0	0	1	0	10				10			Breman 1999						Olson et al. 2012	10	0	0	0	10	0	0
	Atherurus_africanus	0	0	0	0	1									Lahm et al. 2007			Societ‚ de la Haute Mondah,Gabon			Olivero et al. 2017	0	0	0
	Atherurus_africanus	0	0	0	0	1									Lahm et al. 2007			GEB 1 logging camp,Gabon			Olivero et al. 2017	0	0	0
	Atherurus_africanus	0	0	0	0	1									Lahm et al. 2007			Makouké,Gabon			Olivero et al. 2017	0	0	0
	Atherurus_africanus	0	0	0	0	1									Lahm et al. 2007			GEB 2 logging camp,Gabon			Olivero et al. 2017	0	0	0
	Bos_taurus	0	0	0	0	1									Breman et al 1999				0	1	Olson et al. 2012	0	0	1	0	1	0	0
	Bos_taurus	0	0	0	0	1			0	2		2			Leroy et al 2005						Olson et al. 2012	0	2	0	0	2	0	0
	Calcochloris_leucorhinus	0	0	0	0	1									Leirs et al 1999				0	5	Olson et al. 2012	0	0	5	0	5	0	0
	Canis_aureus	0	0	0	0	1									Leirs et al 1999				0	1	Olson et al. 2012	0	0	1	0	1	0	0
	Canis_lupus	0	0	0	0	1									Breman et al 1999				0	14	Olson et al. 2012	0	0	14	0	14	0	0
	Canis_lupus	0	0	0	0	1	0	14				14			Breman 1999						Olson et al. 2012	14	0	0	0	14	0	0
	Canis_lupus	0	0	0	0	1	21	66				66			Allela 2005						Olson et al. 2012	66	0	0	21	66	0	1
	Canis_mesomelas	0	0	0	0	1									Leirs et al 1999				0	1	Olson et al. 2012	0	0	1	0	1	0	0
	Capra_hircus	0	0	0	0	1									Wittmann et al 2007				0	1	Olson et al. 2012	0	0	1	0	1	1	0
ZEBOV	Casinycteris_argynnis	0	0	0	1	0	0	1				2	0	2	Leirs et al. 1999							1	0	0	0	2	0	0
ZEBOV	Casinycteris_argynnis	0	0	0	1	0	0	18				18			Pourrut et al. 2009		Added line					18	0	0	0	18	0	0
ZEBOV	Casinycteris_ophiodon	0	0	0	1	0	0	1	0	1	FILO-L	1			Saéz et al. 2015	"Attempts to demonstrate the presence of Ebola antibodies against Ebola viruses were inconclusive"						1	1	0	0	1	0	0
	Cephalophinae_sp.	0	0	0	0	1									Wittmann et al 2007				0	3	Olson et al. 2012	0	0	3	0	3	1	0
	Cephalophinae_sp.	0	0	0	0	1			1	3		3			Rouquet 2005, Leroy 2004 a,b			Gabon & RoC			Olson et al. 2012	0	3	0	1	3	1	1
	Cephalophus_callipygus	0	0	0	0	1									Lahm et al. 2007			Mékouka,Gabon			Olivero et al. 2017	0	0	0
	Cephalophus_dorsalis	0	0	0	0	1									Lahm et al. 2007			GEB 2 logging camp,Gabon			Olivero et al. 2017	0	0	0	1	1	1	1
universal	Cephalophus_sp.	0	0	0	0	1			1	1		1			Leroy EM et al. 2004a			Lossi			Olivero et al. 2017	0	1	0	1	1	1	1
universal	Cephalophus_sp.	0	0	0	0	1			0	1		1			Leroy EM et al. 2004a			Lossi			Olivero et al. 2017	0	1	0	0	1	1	0
universal	Cephalophus_sp.	0	0	0	0	1									Leroy EM et al. 2004a			Lossi			Olivero et al. 2017	0	0	0
	Cephalophus_sylvicultor	0	0	0	0	1									Lahm et al. 2007			Été,ROC			Olivero et al. 2017	0	0	0
	Cercocebus_galeritus	1	0	0	0	1									Breman et al 1999				0	11	Olson et al. 2012	0	0	11	0	11	0	0
	Cercocebus_galeritus	1	0	0	0	1	0	11				11			Breman 1999						Olson et al. 2012	11	0	0	0	11	0	0
	Cercopithecus_ascanius	1	0	0	0	1									Breman et al 1999				0	94	Olson et al. 2012	0	0	94	0	94	0	0
	Cercopithecus_ascanius	1	0	0	0	1									Leirs et al 1999				0	4	Olson et al. 2012	0	0	4	0	4	0	0
	Cercopithecus_ascanius	1	0	0	0	1									Johnson 1978/Germain 1978				0	2	Olson et al. 2012	0	0	2	0	2	0	0
	Cercopithecus_ascanius	1	0	0	0	1	0	94				94			Breman 1999						Olson et al. 2012	94	0	0	0	94	0	0
	Cercopithecus_ascanius	1	0	0	0	1	0	95				95			Leirs 1999						Olson et al. 2012	95	0	0	0	95	0	0
	Cercopithecus_cephus	1	0	0	0	1									Wittmann et al 2007				0	2	Olson et al. 2012	0	0	2	0	2	1	0
	Cercopithecus_cephus	1	0	0	0	1			0	1		1			Rouquet 2005, Leroy 2004 a,b			Gabon & RoC			Olson et al. 2012	0	1	0	0	1	1	0
	Cercopithecus_cephus	1	0	0	0	1									Lahm et al. 2007			Mbokamabaka,Gabon			Olivero et al. 2017	0	0	0
	Cercopithecus_cephus	1	0	0	0	1									Lahm et al. 2007			M‚kouka,Gabon			Olivero et al. 2017	0	0	0
	Cercopithecus_cephus	1	0	0	0	1									Lahm et al. 2007			GEB 2 logging camp,Gabon			Olivero et al. 2017	0	0	0
ZEBOV	Cercopithecus_erythrotis	1	0	0	0	1	1	3				3			Ogunro et al. 2018			CERCOPAN primate sanctuary, Cross river StateSouthwest Nigeria				3	0	0	1	3	0	1
ZEBOV	Cercopithecus_mona	1	0	0	0	1	0	2				2			Ogunro et al. 2018			Zoological garden, University of Ibadan, Oyo State, Southwest Nigeria				2	0	0	0	2	0	0
ZEBOV	Cercopithecus_mona	1	0	0	0	1	0	4				4			Ogunro et al. 2018			Osun Osogbo sacred groove, Osun StateSouthwest Nigeria				4	0	0	0	4	0	0
ZEBOV	Cercopithecus_mona	1	0	0	0	1	0	14				14			Ogunro et al. 2018			CERCOPAN primate sanctuary, Cross river StateSouthwest Nigeria				14	0	0	0	14	0	0
	Cercopithecus_neglectus	1	0	0	0	1									Breman et al 1999				0	12	Olson et al. 2012	0	0	12	0	12	0	0
	Cercopithecus_neglectus	1	0	0	0	1									Johnson 1978/Germain 1978				0	1	Olson et al. 2012	0	0	1	0	1	0	0
	Cercopithecus_neglectus	1	0	0	0	1	0	12				12			Breman 1999						Olson et al. 2012	12	0	0	0	12	0	0
	Cercopithecus_neglectus	1	0	0	0	1									Leroy EM et al. 2004b			Cameroon			Olivero et al. 2017	0	0	0
	Cercopithecus_nictitans	1	0	0	0	1									Breman et al 1999				0	51	Olson et al. 2012	0	0	51	0	51	0	0
	Cercopithecus_nictitans	1	0	0	0	1									Johnson 1978/Germain 1978				0	1	Olson et al. 2012	0	0	1	0	1	0	0
	Cercopithecus_nictitans	1	0	0	0	1									Leirs et al 1999				0	1	Olson et al. 2012	0	0	1	0	1	0	0
ZEBOV	Cercopithecus_nictitans	1	0	0	0	1	1	23				23			Ogunro et al. 2018			CERCOPAN primate sanctuary, Cross river StateSouthwest Nigeria				23	0	0	1	23	0	1
ZEBOV	Cercopithecus_nictitans	1	0	0	0	1	0	2				2			Ogunro et al. 2018			Zoological garden, University of Ibadan, Oyo StateSouthwest Nigeria				2	0	0	0	2	0	0
	Cercopithecus_nictitans	1	0	0	0	1	0	51				51			Breman 1999						Olson et al. 2012	51	0	0	0	51	0	0
	Cercopithecus_nictitans	1	0	0	0	1									Georges et al. 1999			Mbokamabaka, Gabon			Olivero et al. 2017	0	0	0
	Cercopithecus_nictitans	1	0	0	0	1									Lahm et al. 2007			Mbokamabaka,Gabon			Olivero et al. 2017	0	0	0
	Cercopithecus_nictitans	1	0	0	0	1									Lahm et al. 2007			Minkebé,Gabon			Olivero et al. 2017	0	0	0
	Cercopithecus_nictitans	1	0	0	0	1									Lahm et al. 2007			Asso,Gabon			Olivero et al. 2017	0	0	0
	Cercopithecus_nictitans	1	0	0	0	1									Lahm et al. 2007			Ayina,Gabon			Olivero et al. 2017	0	0	0
	Cercopithecus_nictitans	1	0	0	0	1									Lahm et al. 2007			Été,ROC			Olivero et al. 2017	0	0	0
	Cercopithecus_nictitans	1	0	0	0	1									Lahm et al. 2007			Minkébé,Gabon			Olivero et al. 2017	0	0	0
	Cercopithecus_pogonias	1	0	0	0	1									Breman et al 1999				0	55	Olson et al. 2012	0	0	55	0	55	0	0
	Cercopithecus_pogonias	1	0	0	0	1									Johnson 1978/Germain 1978				0	1	Olson et al. 2012	0	0	1	0	1	0	0
	Cercopithecus_pogonias	1	0	0	0	1	0	55				55			Breman 1999						Olson et al. 2012	55	0	0	0	55	0	0
ZEBOV	Cercopithecus_preussi	1	0	0	0	1	0	1				1			Ogunro et al. 2018			CERCOPAN primate sanctuary, Cross river StateSouthwest Nigeria				1	0	0	0	1	0	0
ZEBOV	Cercopithecus_sabaeus	1	0	0	0	1	0	1				1			Ogunro et al. 2018			Pet monkeys within Ibadan, Oyo StateSouthwest Nigeria				1	0	0	0	1	0	0
ZEBOV	Cercopithecus_sabaeus	1	0	0	0	1	0	2				2			Ogunro et al. 2018			Agodi gardens, Ibadan, Oyo StateSouthwest Nigeria				2	0	0	0	2	0	0
ZEBOV	Cercopithecus_sabaeus	1	0	0	0	1	0	4				4			Ogunro et al. 2018			Biological garden, University of Ilorin, Kwara StateSouthwest Nigeria				4	0	0	0	4	0	0
ZEBOV	Cercopithecus_sabaeus	1	0	0	0	1	0	8				8			Ogunro et al. 2018			Zoological garden, University of Ibadan, Oyo StateSouthwest Nigeria				8	0	0	0	8	0	0
ZEBOV	Cercopithecus_sclateri	1	0	0	0	1	1	7				7			Ogunro et al. 2018			CERCOPAN primate sanctuary, Cross river StateSouthwest Nigeria				7	0	0	1	7	0	1
	Cercopithecus_sp.	1	0	0	0	1									Breman et al 1999				0	1	Olson et al. 2012	0	0	1	0	1	0	0
ZEBOV	Cercopithecus_tantalus	1	0	0	0	1	0	14				14			Ogunro et al. 2018			CERCOPAN primate sanctuary, Cross river StateSouthwest Nigeria				14	0	0	0	14	0	0
ZEBOV	Cercopithecus_torquatus	1	0	0	0	1	0	1				1			Ogunro et al. 2018			Zoological garden, University of Ibadan, Oyo StateSouthwest Nigeria				1	0	0	0	1	0	0
ZEBOV	Cercopithecus_torquatus	1	0	0	0	1	0	32				32			Ogunro et al. 2018			CERCOPAN primate sanctuary, Cross river StateSouthwest Nigeria				32	0	0	0	32	0	0
ZEBOV	Chaerephon_ansorgei	0	0	1	0	0	0	120				121	0	121	Leirs et al. 1999							120	0	0	0	121	0	0
ZEBOV	Chaerephon_major	0	0	1	0	0	0	26				26	0	26	Breman et al. 1999							26	0	0	0	26	0	0
BOMV	Chaerephon_pumilus	0	0	1	0	0			4	55		55			Goldstein, Tracey, et al. 2018			Sierra Leone				0	55	0	4	55	0	1
universal	Chaerephon_pumilus	0	0	1	0	0			3	55		55			Goldstein, Tracey, et al. 2018			Sierra Leone				0	55	0	3	55	0	1
Ebolavirus genus	Chaerephon_pumilus	0	0	1	0	0			2	55		55			Goldstein, Tracey, et al. 2018			Sierra Leone				0	55	0	2	55	0	1
ZEBOV	Chaerephon_pumilus	0	0	1	0	0	0	1	0	1	FILO-L	1			Saéz et al. 2015	"Attempts to demonstrate the presence of Ebola antibodies against Ebola viruses were inconclusive"						1	1	0	0	1	0	0
ZEBOV	Chaerephon_pumilus	0	0	1	0	0	0	210				211	0	211	Leirs et al. 1999		Corrected spelling					210	0	0	0	211	0	0
BOMV	Chaerephon_sp.	0	0						0	1		1			Goldstein, Tracey, et al. 2018			Sierra Leone				0	1	0	0	1	0	0
Ebolavirus genus	Chaerephon_sp.	0	0						0	1		1			Goldstein, Tracey, et al. 2018			Sierra Leone				0	1	0	0	1	0	0
universal	Chaerephon_sp.	0	0						0	1		1			Goldstein, Tracey, et al. 2018			Sierra Leone				0	1	0	0	1	0	0
SUDV	Chaerephon_sp.	0	0				0	44				44			De, HM Nys, et al. 2018	This paper tested dried blood spots with a Luminex-based serologic assay adapted for bats. The range of number is due to different cut-off value in Table 4.						44	0	0	0	44	0	0
ZEBOV	Chaerephon_sp.	0	0				0	44				44			De, HM Nys, et al. 2018	This paper tested dried blood spots with a Luminex-based serologic assay adapted for bats. The range of number is due to different cut-off value in Table 4.						44	0	0	0	44	0	0
	Civettictis_civetta	0	0	0	0	1									Lahm et al. 2007			Zadié Region,Gabon			Olivero et al. 2017	0	0	0
	Colobus_guereza	0	0	0	0	1									Lahm et al. 2007			Ayina,Gabon			Olivero et al. 2017	0	0	0
	Colobus_satanas	1	0	0	0	1									Lahm et al. 2007			Mbokamabaka,Gabon			Olivero et al. 2017	0	0	0
	Colobus_satanas	1	0	0	0	1									Lahm et al. 2007			Ayina,Gabon			Olivero et al. 2017	0	0	0
	Colobus_satanas	1	0	0	0	1									Lahm et al. 2007			Pounga,ROC			Olivero et al. 2017	0	0	0
	Colomys_goslingi	0	0	0	0	1									Leirs et al 1999				0	1	Olson et al. 2012	0	0	1	0	1	0	0
	Colomys_goslingi	0	0	0	0	1	0	1				1			Leirs 1999						Olson et al. 2012	1	0	0	0	1	0	0
	Cricetomys_emini	0	0	0	0	1									Breman et al 1999				0	19	Olson et al. 2012	0	0	19	0	19	0	0
	Cricetomys_emini	0	0	0	0	1	0	19				19			Breman 1999						Olson et al. 2012	19	0	0	0	19	0	0
	Cricetomys_gambianus	0	0	0	0	1									Leirs et al 1999				0	5	Olson et al. 2012	0	0	5	0	5	0	0
	Cricetomys_gambianus	0	0	0	0	1	0	5				5			Leirs 1999						Olson et al. 2012	5	0	0	0	5	0	0
	Crocidura_attila	0	0	0	0	1									Leirs et al 1999				0	1	Olson et al. 2012	0	0	1	0	1	0	0
	Crocidura_denti	0	0	0	0	1									Leirs et al 1999				0	3	Olson et al. 2012	0	0	3	0	3	0	0
	Crocidura_denti	0	0	0	0	1	0	2				2			Leirs 1999						Olson et al. 2012	2	0	0	0	2	0	0
	Crocidura_dolichura	0	0	0	0	1									Leirs et al 1999				0	1	Olson et al. 2012	0	0	1	0	1	0	0
	Crocidura_dolichura	0	0	0	0	1	0	1				1			Leirs 1999						Olson et al. 2012	1	0	0	0	1	0	0
	Crocidura_hildegardeae	0	0	0	0	1									Leirs et al 1999				0	3	Olson et al. 2012	0	0	3	0	3	0	0
	Crocidura_hildegardeae	0	0	0	0	1	0	3				3			Leirs 1999						Olson et al. 2012	3	0	0	0	3	0	0
	Crocidura_hirta	0	0	0	0	1									Leirs et al 1999				0	12	Olson et al. 2012	0	0	12	0	12	0	0
	Crocidura_hirta	0	0	0	0	1	0	11				11			Leirs 1999						Olson et al. 2012	11	0	0	0	11	0	0
	Crocidura_littoralis	0	0	0	0	1									Leirs et al 1999				0	3	Olson et al. 2012	0	0	3	0	3	0	0
	Crocidura_littoralis	0	0	0	0	1	0	3				3			Leirs 1999						Olson et al. 2012	3	0	0	0	3	0	0
	Crocidura_olivieri	0	0	0	0	1									Leirs et al 1999				0	55	Olson et al. 2012	0	0	55	0	55	0	0
	Crocidura_olivieri	0	0	0	0	1	0	46				46			Leirs 1999						Olson et al. 2012	46	0	0	0	46	0	0
	Crocidura_parvipes	0	0	0	0	1									Leirs et al 1999				0	3	Olson et al. 2012	0	0	3	0	3	0	0
	Crocidura_parvipes	0	0	0	0	1	0	3				3			Leirs 1999						Olson et al. 2012	3	0	0	0	3	0	0
	Crocidura_poensis	0	0	0	0	1									Leirs et al 1999				0	20	Olson et al. 2012	0	0	20	0	20	0	0
	Crocidura_poensis	0	0	0	0	1									Breman et al 1999				0	9	Olson et al. 2012	0	0	9	0	9	0	0
	Crocidura_poensis	0	0	0	0	1	0	9				9			Breman 1999						Olson et al. 2012	9	0	0	0	9	0	0
	Crocidura_poensis	0	0	0	0	1	0	28				28			Leirs 1999						Olson et al. 2012	28	0	0	0	28	0	0
	Crocidura_sp.	0	0	0	0	1									Leirs et al 1999				0	5	Olson et al. 2012	0	0	5	0	5	0	0
	Crossarchus_alexandri	0	0	0	0	1									Breman et al 1999				0	7	Olson et al. 2012	0	0	7	0	7	0	0
	Crossarchus_alexandri	0	0	0	0	1	0	7				7			Breman 1999						Olson et al. 2012	7	0	0	0	7	0	0
universal	Cynopterus_brachyotis	0	0	0	1	0			0	10	FILO-L	10			Wacharapluesadee et al. 2015	Used consensus primer (FILO-L) for all filoviruses						0	10	0	0	10	0	0
BDBV	Cynopterus_brachyotis	0	0	0	1	0	see note	153				153			Laing, Eric D., et al. 2018	Fig 1 shows positive samples, but it is hard to count the number.						153	0	0	1	153	0	1
SUDV	Cynopterus_brachyotis	0	0	0	1	0	see note	153				153			Laing, Eric D., et al. 2018	Fig 1 shows positive samples, but it is hard to count the number.						153	0	0	1	153	0	1
TAFV	Cynopterus_brachyotis	0	0	0	1	0	see note	153				153			Laing, Eric D., et al. 2018	Fig 1 shows positive samples, but it is hard to count the number.						153	0	0	1	153	0	1
ZEBOV	Cynopterus_brachyotis	0	0	0	1	0	see note	153				153			Laing, Eric D., et al. 2018	Fig 1 shows positive samples, but it is hard to count the number.						153	0	0	1	153	0	1
RESTV	Cynopterus_brachyotis	0	0	0	1	0	0	35				35			Taniguchi et al. 2011							35	0	0	0	35	0	0
Reston ebolavirus–monkey	Cynopterus_brachyotis	0	0	0	1	0	0	153				153			Laing, Eric D., et al. 2018							153	0	0	0	153	0	0
Reston ebolavirus–pig	Cynopterus_brachyotis	0	0	0	1	0	0	153				153			Laing, Eric D., et al. 2018							153	0	0	0	153	0	0
RESTV	Cynopterus_sphinx	0	0	0	1	0	2	2	see note	see note	FILO-L	2			Yuan et al. 2012	Screen RESTV only, Ab+ retested with RESTV and ZEBOV (authors recommend 1:1 RESTV:ZEBOV to detect more.) PCR testing was done for some individuals, all came back negative, results not given by species.						2	0	0	2	2	0	1
ZEBOV	Cynopterus_sphinx	0	0	0	1	0	1	2	see note	see note	FILO-L	2			Yuan et al. 2012	Screened with RESTV; 32 RESTV+, 25 ZEBOV Ab+ ELISA and/or WB; not all positives listed by species.						2	0	0	1	2	0	1
universal	Cynopterus_sphinx	0	0	0	1	0			0	4	FILO-L	4			Wacharapluesadee et al. 2015	Used consensus primer (FILO-L) for all filoviruses						0	4	0	0	4	0	0
	Dasymys_incomtus	0	0	0	0	1									Leirs et al 1999				0	6	Olson et al. 2012	0	0	6	0	6	0	0
	Dasymys_incomtus	0	0	0	0	1	0	6				6			Leirs 1999						Olson et al. 2012	6	0	0	0	6	0	0
	Dendrohyrax_dorsalis	0	0	0	0	1									Breman et al 1999				0	7	Olson et al. 2012	0	0	7	0	7	0	0
	Dendrohyrax_dorsalis	0	0	0	0	1	0	7				7			Breman 1999						Olson et al. 2012	7	0	0	0	7	0	0
	Dendromus_mesomelas	0	0	0	0	1									Leirs et al 1999				0	52	Olson et al. 2012	0	0	52	0	52	0	0
	Dendromus_mesomelas	0	0	0	0	1	0	53				53			Leirs 1999						Olson et al. 2012	53	0	0	0	53	0	0
	Dendromus_mystacalis	0	0	0	0	1									Leirs et al 1999				0	3	Olson et al. 2012	0	0	3	0	3	0	0
	Dendromus_mystacalis	0	0	0	0	1	0	3				3			Leirs 1999						Olson et al. 2012	3	0	0	0	3	0	0
	Dendromus_sp.	0	0	0	0	1									Leirs et al 1999				0	4	Olson et al. 2012	0	0	4	0	4	0	0
	Dendromus_sp.	0	0	0	0	1	0	4				4			Leirs 1999						Olson et al. 2012	4	0	0	0	4	0	0
	Duikers_(Bovidae)	0	0	0	0	1									Lahm et al. 2007			Elir,ROC			Olivero et al. 2017	0	0	0
	Duikers_(Bovidae)	0	0	0	0	1									Lahm et al. 2007			Zambakangaka,Gabon			Olivero et al. 2017	0	0	0
SUDV	Eidolon_helvum	0	0	0	1	0	19	748	0	748	FILO-NP	748			Ogawa et al. 2015	Screened for all Ab, universal primers used.						748	748	0	19	748	0	1
ZEBOV	Eidolon_helvum	0	0	0	1	0	19	748	0	748	FILO-NP	748			Ogawa et al. 2015	Screened for all Ab, universal primers used.						748	748	0	19	748	0	1
TAFV	Eidolon_helvum	0	0	0	1	0	9	748	0	748	FILO-NP	748			Ogawa et al. 2015	Screened for all Ab, universal primers used.						748	748	0	9	748	0	1
BDBV	Eidolon_helvum	0	0	0	1	0	8	748	0	748	FILO-NP	748			Ogawa et al. 2015	Screened for all Ab, universal primers used.						748	748	0	8	748	0	1
RESTV	Eidolon_helvum	0	0	0	1	0	0	748	0	748	FILO-NP	748			Ogawa et al. 2015	Screened for all Ab, universal primers used.						748	748	0	0	748	0	0
ZEBOV	Eidolon_helvum	0	0	0	1	0	0	6	0	6	FILO-L	6			Saéz et al. 2015	"Attempts to demonstrate the presence of Ebola antibodies against Ebola viruses were inconclusive"						6	6	0	0	6	0	0
BOMV	Eidolon_helvum	0	0	0	1	0			0	2		2			Goldstein, Tracey, et al. 2018			Sierra Leone				0	2	0	0	2	0	0
Ebolavirus genus	Eidolon_helvum	0	0	0	1	0			0	2		2			Goldstein, Tracey, et al. 2018			Sierra Leone				0	2	0	0	2	0	0
universal	Eidolon_helvum	0	0	0	1	0			0	2		2			Goldstein, Tracey, et al. 2018			Sierra Leone				0	2	0	0	2	0	0
ZEBOV	Eidolon_helvum	0	0	0	1	0	2019-01-16	480				480			De, HM Nys, et al. 2018	This paper tested dried blood spots with a Luminex-based serologic assay adapted for bats. The range of number is due to different cut-off value in Table 4.						480	0	0	16	480	0	1
SUDV	Eidolon_helvum	0	0	0	1	0	0-14	480				480			De, HM Nys, et al. 2018	This paper tested dried blood spots with a Luminex-based serologic assay adapted for bats. The range of number is due to different cut-off value in Table 4.						480	0	0	14	480	0	1
ZEBOV	Eidolon_helvum	0	0	0	1	0	1	262				262			Hayman et al. 2010							262	0	0	1	262	0	1
ZEBOV	Eidolon_helvum	0	0	0	1	0	0	6				6	0	6	Breman et al. 1999							6	0	0	0	6	0	0
ZEBOV	Eidolon_helvum	0	0	0	1	0	0	49				49			Pourrut et al. 2009		Added line					49	0	0	0	49	0	0
RESTV	Emballonura_alecto	0	0	1	0	0	0	9				9			Taniguchi et al. 2011							9	0	0	0	9	0	0
universal	Eonycteris_spelaea	0	0	0	1	0			0	12	FILO-L	12			Wacharapluesadee et al. 2015	Used consensus primer (FILO-L) for all filoviruses						0	12	0	0	12	0	0
BDBV	Eonycteris_spelaea	0	0	0	1	0	see note	186				186			Laing, Eric D., et al. 2018	Fig 1 shows positive samples, but it is hard to count the number.						186	0	0	1	186	0	1
SUDV	Eonycteris_spelaea	0	0	0	1	0	see note	186				186			Laing, Eric D., et al. 2018	Fig 1 shows positive samples, but it is hard to count the number.						186	0	0	1	186	0	1
TAFV	Eonycteris_spelaea	0	0	0	1	0	see note	186				186			Laing, Eric D., et al. 2018	Fig 1 shows positive samples, but it is hard to count the number.						186	0	0	1	186	0	1
ZEBOV	Eonycteris_spelaea	0	0	0	1	0	see note	186				186			Laing, Eric D., et al. 2018	Fig 1 shows positive samples, but it is hard to count the number.						186	0	0	1	186	0	1
RESTV	Eonycteris_spelaea	0	0	0	1	0	0	5				5			Taniguchi et al. 2011							5	0	0	0	5	0	0
Reston ebolavirus–monkey	Eonycteris_spelaea	0	0	0	1	0	0	186				186			Laing, Eric D., et al. 2018							186	0	0	0	186	0	0
Reston ebolavirus–pig	Eonycteris_spelaea	0	0	0	1	0	0	186				186			Laing, Eric D., et al. 2018							186	0	0	0	186	0	0
BOMV	Epomophorous_sp.	0	0	0	1	0			0	5		5			Goldstein, Tracey, et al. 2018			Sierra Leone				0	5	0	0	5	0	0
Ebolavirus genus	Epomophorous_sp.	0	0	0	1	0			0	5		5			Goldstein, Tracey, et al. 2018			Sierra Leone				0	5	0	0	5	0	0
universal	Epomophorous_sp.	0	0	0	1	0			0	5		5			Goldstein, Tracey, et al. 2018			Sierra Leone				0	5	0	0	5	0	0
BOMV	Epomophorus_gambianus	0	0	0	1	0			0	1		1			Goldstein, Tracey, et al. 2018			Sierra Leone				0	1	0	0	1	0	0
Ebolavirus genus	Epomophorus_gambianus	0	0	0	1	0			0	1		1			Goldstein, Tracey, et al. 2018			Sierra Leone				0	1	0	0	1	0	0
universal	Epomophorus_gambianus	0	0	0	1	0			0	1		1			Goldstein, Tracey, et al. 2018			Sierra Leone				0	1	0	0	1	0	0
screen	Epomophorus_gambianus	0	0	0	1	0	7	37				37			Hayman et al. 2012a	Number that reacted to 1:1 RESTV:ZEBOV screen but not to singly	In total, 37 tested and 14 were positive for ebolaviruses. Of those 14, 5 were positive for ZEBOV, 3 were positive for RESTV, and 7 were positive, but the virus species wasn't specified (one bat had both RESTV and ZEBOV)					37	0	0	7	37	0	1
ZEBOV	Epomophorus_gambianus	0	0	0	1	0	5	37				37			Hayman et al. 2012a		In total, 37 tested and 14 were positive for ebolaviruses. Of those 14, 5 were positive for ZEBOV, 3 were positive for RESTV, and 7 were positive, but the virus species wasn't specified (one bat had both RESTV and ZEBOV)					37	0	0	5	37	0	1
RESTV	Epomophorus_gambianus	0	0	0	1	0	3	37				37			Hayman et al. 2012a		In total, 37 tested and 14 were positive for ebolaviruses. Of those 14, 5 were positive for ZEBOV, 3 were positive for RESTV, and 7 were positive, but the virus species wasn't specified (one bat had both RESTV and ZEBOV)					37	0	0	3	37	0	1
ZEBOV	Epomophorus_sp.	0	0	0	1	0	0-1	207				207			De, HM Nys, et al. 2018	This paper tested dried blood spots with a Luminex-based serologic assay adapted for bats. The range of number is due to different cut-off value in Table 4.						207	0	0	1	207	0	1
SUDV	Epomophorus_sp.	0	0	0	1	0	0	207				207			De, HM Nys, et al. 2018	This paper tested dried blood spots with a Luminex-based serologic assay adapted for bats. The range of number is due to different cut-off value in Table 4.						207	0	0	0	207	0	0
ZEBOV	Epomops_buettikoferi	0	0	0	1	0	0	17	0	17	FILO-L	17			Saéz et al. 2015	"Attempts to demonstrate the presence of Ebola antibodies against Ebola viruses were inconclusive"						17	17	0	0	17	0	0
BOMV	Epomops_buettikoferi	0	0	0	1	0			0	2		2			Goldstein, Tracey, et al. 2018			Sierra Leone				0	2	0	0	2	0	0
Ebolavirus genus	Epomops_buettikoferi	0	0	0	1	0			0	2		2			Goldstein, Tracey, et al. 2018			Sierra Leone				0	2	0	0	2	0	0
universal	Epomops_buettikoferi	0	0	0	1	0			0	2		2			Goldstein, Tracey, et al. 2018			Sierra Leone				0	2	0	0	2	0	0
RESTV	Epomops_buettikoferi	0	0	0	1	0	0	1				1			Hayman et al. 2012a		In total, 1 tested					1	0	0	0	1	0	0
screen	Epomops_buettikoferi	0	0	0	1	0	0	1				1			Hayman et al. 2012a	Number that reacted to 1:1 RESTV:ZEBOV screen but not to singly	In total, 1 tested					1	0	0	0	1	0	0
ZEBOV	Epomops_buettikoferi	0	0	0	1	0	0	1				1			Hayman et al. 2012a		In total, 1 tested					1	0	0	0	1	0	0
ZEBOV	Epomops_franqueti	0	0	0	1	0	8	117	5	117	FILO-L	117	see note	see note	Leroy et al. 2005	Isolation attempted, all negative, but listed by location not species. Some animals tested for Ab and not PCR and vice-versa. No overlap in PCR/Ab positives, so number of bats positive is Ab+ plus PCR. Several filo primers used in addition to universal.	Changed/corrected # tested to 117 from 17. Only reports positives, doesn't list species for negatives					117	117	0	8	117	0	1
ZEBOV	Epomops_franqueti	0	0	0	1	0	36	805				805			Pourrut et al. 2009							805	0	0	36	805	0	1
ZEBOV	Epomops_franqueti	0	0	0	1	0	25	725				725			Pourrut et al. 2007		Originally there were two entries for this species and this citation, with 2/679 and 36/805. Combined to a single line and corrected to indicate 25 (20+5) total positive bats out of 725 (355+370) tested					725	0	0	25	725	0	1
screen	Epomops_franqueti	0	0	0	1	0	7	27				27			Hayman et al. 2012a	Number that reacted to 1:1 RESTV:ZEBOV screen but not to singly	In total, 27 tested and 10 were positive for ebolaviruses. Of those 10, 3 were positive for ZEBOV, 0 were positive for RESTV, and 7 were positive, but the virus species wasn't specified					27	0	0	7	27	0	1
ZEBOV	Epomops_franqueti	0	0	0	1	0	3	27				27			Hayman et al. 2012a		In total, 27 tested and 10 were positive for ebolaviruses. Of those 10, 3 were positive for ZEBOV, 0 were positive for RESTV, and 7 were positive, but the virus species wasn't specified					27	0	0	3	27	0	1
ZEBOV	Epomops_franqueti	0	0	0	1	0	0	2				2	0	2	Leirs et al. 1999							2	0	0	0	2	0	0
ZEBOV	Epomops_franqueti	0	0	0	1	0	0	21				21	0	21	Breman et al. 1999							21	0	0	0	21	0	0
RESTV	Epomops_franqueti	0	0	0	1	0	0	27				27			Hayman et al. 2012a		In total, 27 tested and 10 were positive for ebolaviruses. Of those 10, 3 were positive for ZEBOV, 0 were positive for RESTV, and 7 were positive, but the virus species wasn't specified					27	0	0	0	27	0	0
SUDV	Epomops_sp.	0	0	0	1	0	0	280				280			De, HM Nys, et al. 2018	This paper tested dried blood spots with a Luminex-based serologic assay adapted for bats. The range of number is due to different cut-off value in Table 4.						280	0	0	0	280	0	0
ZEBOV	Epomops_sp.	0	0	0	1	0	0	280				280			De, HM Nys, et al. 2018	This paper tested dried blood spots with a Luminex-based serologic assay adapted for bats. The range of number is due to different cut-off value in Table 4.						280	0	0	0	280	0	0
ZEBOV	Erythrocebas_patas	0	0	0	0	1	0	1				1			Ogunro et al. 2018			Agodi gardens, Ibadan, Oyo StateSouthwest Nigeria				1	0	0	0	1	0	0
ZEBOV	Erythrocebas_patas	0	0	0	0	1	0	4				4			Ogunro et al. 2018			Biological garden, University of Ilorin, Kwara StateSouthwest Nigeria				4	0	0	0	4	0	0
ZEBOV	Erythrocebas_patas	0	0	0	0	1	0	4				4			Ogunro et al. 2018			Pet monkeys within Ibadan, Oyo StateSouthwest Nigeria				4	0	0	0	4	0	0
ZEBOV	Erythrocebas_patas	0	0	0	0	1	0	8				8			Ogunro et al. 2018			Zoological garden, University of Ibadan, Oyo StateSouthwest Nigeria				8	0	0	0	8	0	0
	Funisciurus_anerythurs	0	0	0	0	1									Breman et al 1999				0	58	Olson et al. 2012	0	0	58	0	58	0	0
	Funisciurus_anerythurs	0	0	0	0	1	0	58				58			Breman 1999						Olson et al. 2012	58	0	0	0	58	0	0
	Funisciurus_congicus	0	0	0	0	1									Leirs et al 1999				0	36	Olson et al. 2012	0	0	36	0	36	0	0
	Funisciurus_congicus	0	0	0	0	1	0	36				36			Leirs 1999						Olson et al. 2012	36	0	0	0	36	0	0
	Funisciurus_lemniscatus	0	0	0	0	1									Breman et al 1999				0	6	Olson et al. 2012	0	0	6	0	6	0	0
	Funisciurus_lemniscatus	0	0	0	0	1	0	6				6			Breman 1999						Olson et al. 2012	6	0	0	0	6	0	0
	Funisciurus_sp.	0	0	0	0	1									Johnson 1978/Germain 1978				0	2	Olson et al. 2012	0	0	2	0	2	0	0
	Funiscurus_pyrrhopus	0	0	0	0	1									Leirs et al 1999				0	15	Olson et al. 2012	0	0	15	0	15	0	0
	Funiscurus_pyrrhopus	0	0	0	0	1	0	16				16			Leirs 1999						Olson et al. 2012	16	0	0	0	16	0	0
	Galago_demidoff	0	0	0	0	1									Leirs et al 1999				0	7	Olson et al. 2012	0	0	7	0	7	0	0
	Galago_demidoff	0	0	0	0	1	0	6				6			Leirs 1999						Olson et al. 2012	6	0	0	0	6	0	0
	Galerella_sanguinea	0	0	0	0	1									Leirs et al 1999				0	3	Olson et al. 2012	0	0	3	0	3	0	0
	Genetta_servalina	0	0	0	0	1									Leirs et al 1999				0	3	Olson et al. 2012	0	0	3	0	3	0	0
	Genetta_sp.	0	0	0	0	1			0	4		4			Rouquet 2005, Leroy 2004 a,b			Gabon & RoC			Olson et al. 2012	0	4	0	0	4	1	0
universal	Genetta_sp.	0	0	0	0	1	0	2				2			Georges-Coubot, 1997	Immunostaining of Ebola virus antigens		Gabon			Olson et al. 2012	2	0	0	0	2	1	0
	Genetta_tigrina	0	0	0	0	1									Leirs et al 1999				0	3	Olson et al. 2012	0	0	3	0	3	0	0
	Gerbilliscus_validus	0	0	0	0	1									Leirs et al 1999				0	20	Olson et al. 2012	0	0	20	0	20	0	0
	Gerbilliscus_validus	0	0	0	0	1	0	19				19			Leirs 1999						Olson et al. 2012	19	0	0	0	19	0	0
BOMV	Glauconycteris_poensis	0	0	1	0	0			0	1		1			Goldstein, Tracey, et al. 2018			Sierra Leone				0	1	0	0	1	0	0
Ebolavirus genus	Glauconycteris_poensis	0	0	1	0	0			0	1		1			Goldstein, Tracey, et al. 2018			Sierra Leone				0	1	0	0	1	0	0
universal	Glauconycteris_poensis	0	0	1	0	0			0	1		1			Goldstein, Tracey, et al. 2018			Sierra Leone				0	1	0	0	1	0	0
SUDV	Glauconycteris_sp.	0	0				0	3				3			De, HM Nys, et al. 2018	This paper tested dried blood spots with a Luminex-based serologic assay adapted for bats. The range of number is due to different cut-off value in Table 4.						3	0	0	0	3	0	0
ZEBOV	Glauconycteris_sp.	0	0				0	3				3			De, HM Nys, et al. 2018	This paper tested dried blood spots with a Luminex-based serologic assay adapted for bats. The range of number is due to different cut-off value in Table 4.						3	0	0	0	3	0	0
	Gorilla_gorilla	0	1	0	0	1			3	11		11			Rouquet 2005, Leroy 2004 a,b			Gabon & RoC			Olson et al. 2012	0	11	0	3	11	1	1
universal	Gorilla_gorilla	0	1	0	0	1	1	1	1	1		1			Leroy EM et al. 2004a			Gabon			Olivero et al. 2017	1	1	0	1	1	1	1
universal	Gorilla_gorilla	0	1	0	0	1	1	1	1	1		1			Leroy EM et al. 2004a			Lossi			Olivero et al. 2017	1	1	0	1	1	1	1
universal	Gorilla_gorilla	0	1	0	0	1	1	1	1	1		1			Leroy EM et al. 2004a			Lossi			Olivero et al. 2017	1	1	0	1	1	1	1
universal	Gorilla_gorilla	0	1	0	0	1	1	1	0	1		1			Leroy EM et al. 2004a			Lossi			Olivero et al. 2017	1	1	0	1	1	1	1
universal	Gorilla_gorilla	0	1	0	0	1	1	1	1	1		1			Leroy EM et al. 2004a			Mbanza			Olivero et al. 2017	1	1	0	1	1	1	1
universal	Gorilla_gorilla	0	1	0	0	1			1	1		1			Leroy EM et al. 2004a			Gabon			Olivero et al. 2017	0	1	0	1	1	1	1
universal	Gorilla_gorilla	0	1	0	0	1			1	1		1			Leroy EM et al. 2004a			Gabon			Olivero et al. 2017	0	1	0	1	1	1	1
universal	Gorilla_gorilla	0	1	0	0	1			1	1		1			Leroy EM et al. 2004a			Gabon			Olivero et al. 2017	0	1	0	1	1	1	1
universal	Gorilla_gorilla	0	1	0	0	1			1	1		1			Leroy EM et al. 2004a			Lossi			Olivero et al. 2017	0	1	0	1	1	1	1
universal	Gorilla_gorilla	0	1	0	0	1			1	1		1			Leroy EM et al. 2004a			Lossi			Olivero et al. 2017	0	1	0	1	1	1	1
universal	Gorilla_gorilla	0	1	0	0	1	10	11				11			Georges-Coubot, 1997	Immunostaining of Ebola virus antigens		Gabon			Olson et al. 2012	11	0	0	10	11	1	1
	Gorilla_gorilla	0	1	0	0	1									Caillud D et al. 2006			Lokoué, Gabon			Olivero et al. 2017	0	0	0
	Gorilla_gorilla	0	1	0	0	1									Georges et al. 1999			Andock, Gabon			Olivero et al. 2017	0	0	0
	Gorilla_gorilla	0	1	0	0	1									Lahm et al. 2007			Mbokamabaka,Gabon			Olivero et al. 2017	0	0	0
	Gorilla_gorilla	0	1	0	0	1									Lahm et al. 2007			Téka Téka,Gabon			Olivero et al. 2017	0	0	0
	Gorilla_gorilla	0	1	0	0	1									Lahm et al. 2007			Asso,Gabon			Olivero et al. 2017	0	0	0
	Gorilla_gorilla	0	1	0	0	1									Lahm et al. 2007			Citron,Gabon			Olivero et al. 2017	0	0	0
	Gorilla_gorilla	0	1	0	0	1									Lahm et al. 2007			Ayina,Gabon			Olivero et al. 2017	0	0	0
	Gorilla_gorilla	0	1	0	0	1									Lahm et al. 2007			Bibeh zone 1,Gabon			Olivero et al. 2017	0	0	0
	Gorilla_gorilla	0	1	0	0	1									Lahm et al. 2007			Societ‚ de la Haute Mondah,Gabon			Olivero et al. 2017	0	0	0
	Gorilla_gorilla	0	1	0	0	1									Lahm et al. 2007			Été,ROC			Olivero et al. 2017	0	0	0
	Gorilla_gorilla	0	1	0	0	1									Lahm et al. 2007			Bibeh zone 2,Gabon			Olivero et al. 2017	0	0	0
	Gorilla_gorilla	0	1	0	0	1									Lahm et al. 2007			Rougier 2 logging camp,Gabon			Olivero et al. 2017	0	0	0
	Gorilla_gorilla	0	1	0	0	1									Lahm et al. 2007			GEB 2 logging camp,Gabon			Olivero et al. 2017	0	0	0
	Gorilla_gorilla	0	1	0	0	1									Lahm et al. 2007			Zadié Region,Gabon			Olivero et al. 2017	0	0	0
	Gorilla_gorilla	0	1	0	0	1									Lahm et al. 2007			Zambakangaka,Gabon			Olivero et al. 2017	0	0	0
	Gorilla_gorilla	0	1	0	0	1									Lahm et al. 2007			Odzala National Park,ROC			Olivero et al. 2017	0	0	0
	Gorilla_gorilla	0	1	0	0	1									Lahm et al. 2007			Lambaréné,Gabon			Olivero et al. 2017	0	0	0
	Gorilla_gorilla	0	1	0	0	1									Leroy EM et al. 2004b			Cameroon			Olivero et al. 2017	0	0	0
	Grammomys_dolichurus	0	0	0	0	1									Leirs et al 1999				0	9	Olson et al. 2012	0	0	9	0	9	0	0
	Grammomys_dolichurus	0	0	0	0	1	0	9				9			Leirs 1999						Olson et al. 2012	9	0	0	0	9	0	0
	Grammomys_poensis	0	0	0	0	1									Breman et al 1999				0	13	Olson et al. 2012	0	0	13	0	13	0	0
	Grammomys_poensis	0	0	0	0	1									Johnson 1978/Germain 1978				0	5	Olson et al. 2012	0	0	5	0	5	0	0
	Grammomys_poensis	0	0	0	0	1									Leirs et al 1999				0	1	Olson et al. 2012	0	0	1	0	1	0	0
	Grammomys_poensis	0	0	0	0	1	0	13				13			Breman 1999						Olson et al. 2012	13	0	0	0	13	0	0
	Grammomys_poensis	0	0	0	0	1	0	14				14			Leirs 1999						Olson et al. 2012	14	0	0	0	14	0	0
	Graphiurus_lorraineus	0	0	0	0	1									Leirs et al 1999				0	1	Olson et al. 2012	0	0	1	0	1	0	0
	Graphiurus_lorraineus	0	0	0	0	1	0	1				1			Leirs 1999						Olson et al. 2012	1	0	0	0	1	0	0
	Graphiurus_sp.	0	0	0	0	1									Breman et al 1999				0	19	Olson et al. 2012	0	0	19	0	19	0	0
	Graphiurus_sp.	0	0	0	0	1									Johnson 1978/Germain 1978				0	3	Olson et al. 2012	0	0	3	0	3	0	0
	Graphiurus_sp.	0	0	0	0	1	0	19				19			Breman 1999						Olson et al. 2012	19	0	0	0	19	0	0
RESTV	Haplonycteris_fischeri	0	0	0	1	0	0	6				6			Taniguchi et al. 2011							6	0	0	0	6	0	0
	Heliosciurus_rufobrachium	0	0	0	0	1									Breman et al 1999				0	58	Olson et al. 2012	0	0	58	0	58	0	0
	Heliosciurus_rufobrachium	0	0	0	0	1	0	58				58			Breman 1999						Olson et al. 2012	58	0	0	0	58	0	0
BOMV	Hipposideros_abae	0	0	1	0	0			0	7		7			Goldstein, Tracey, et al. 2018			Sierra Leone				0	7	0	0	7	0	0
Ebolavirus genus	Hipposideros_abae	0	0	1	0	0			0	7		7			Goldstein, Tracey, et al. 2018			Sierra Leone				0	7	0	0	7	0	0
universal	Hipposideros_abae	0	0	1	0	0			0	7		7			Goldstein, Tracey, et al. 2018			Sierra Leone				0	7	0	0	7	0	0
RESTV	Hipposideros_armiger	0	0	1	0	0	0	41	see note	see note	FILO-L	41			Yuan et al. 2012	Screen RESTV only, Ab+ retested with RESTV and ZEBOV (authors recommend 1:1 RESTV:ZEBOV to detect more.) PCR testing was done for some individuals, all came back negative, results not given by species.						41	0	0	0	41	0	0
universal	Hipposideros_armiger	0	0	1	0	0			0	113	FILO-L	113			Wacharapluesadee et al. 2015	Used consensus primer (FILO-L) for all filoviruses						0	113	0	0	113	0	0
ZEBOV	Hipposideros_caffer	0	0	1	0	0	0	18	0	18	FILO-L	18			Saéz et al. 2015	"Attempts to demonstrate the presence of Ebola antibodies against Ebola viruses were inconclusive"						18	18	0	0	18	0	0
universal	Hipposideros_caffer	0	0	1	0	0	see note	see note	0	13	FILO-L	13	see note	see note	Swanepoel et al. 2007	Same # of isolation attempts as PCR. More FILO-L sequencing attempts than MARV-specific, but a MARV-specific PCR came back positive (no positives for FILO-L).	Added line					0	13	0	0	13	0	0
RESTV	Hipposideros_cineraceus	0	0	1	0	0	0	111	see note	see note	FILO-L	111			Yuan et al. 2012	Screen RESTV only, Ab+ retested with RESTV and ZEBOV (authors recommend 1:1 RESTV:ZEBOV to detect more.) PCR testing was done for some individuals, all came back negative, results not given by species.						111	0	0	0	111	0	0
universal	Hipposideros_cineraceus	0	0	1	0	0			0	4	FILO-L	4			Wacharapluesadee et al. 2015	Used consensus primer (FILO-L) for all filoviruses						0	4	0	0	4	0	0
universal	Hipposideros_commersoni	0	0	1	0	0	see note	see note	0	17	FILO-L	17	see note	see note	Swanepoel et al. 2007	Same # of isolation attempts as PCR. More FILO-L sequencing attempts than MARV-specific, but a MARV-specific PCR came back positive (no positives for FILO-L).	Added line					0	17	0	0	17	0	0
ZEBOV	Hipposideros_cyclops	0	0	1	0	0	0	23	0	23	FILO-L	23			Saéz et al. 2015	"Attempts to demonstrate the presence of Ebola antibodies against Ebola viruses were inconclusive"						23	23	0	0	23	0	0
ZEBOV	Hipposideros_cyclops	0	0	1	0	0	0	52				52	0	52	Breman et al. 1999							52	0	0	0	52	0	0
RESTV	Hipposideros_diadema	0	0	1	0	0	0	1				1			Taniguchi et al. 2011							1	0	0	0	1	0	0
ZEBOV	Hipposideros_gigas	0	0	1	0	0	3	24				24			Pourrut et al. 2009	H. gigas samples were pooled with M. condylurus samples in this study; positive results are for the pooled sample containing both species.	test included Mops condylurus, unclear how many individuals of this species contributed to seropositivity					24	0	0	3	24	0	1
BOMV	Hipposideros_jonesi	0	0	1	0	0			0	4		4			Goldstein, Tracey, et al. 2018			Sierra Leone				0	4	0	0	4	0	0
Ebolavirus genus	Hipposideros_jonesi	0	0	1	0	0			0	4		4			Goldstein, Tracey, et al. 2018			Sierra Leone				0	4	0	0	4	0	0
universal	Hipposideros_jonesi	0	0	1	0	0			0	4		4			Goldstein, Tracey, et al. 2018			Sierra Leone				0	4	0	0	4	0	0
ZEBOV	Hipposideros_jonesi	0	0	1	0	0	0	1	0	1	FILO-L	1			Saéz et al. 2015	"Attempts to demonstrate the presence of Ebola antibodies against Ebola viruses were inconclusive"						1	1	0	0	1	0	0
RESTV	Hipposideros_larvatus	0	0	1	0	0	0	21	see note	see note	FILO-L	21			Yuan et al. 2012	Screen RESTV only, Ab+ retested with RESTV and ZEBOV (authors recommend 1:1 RESTV:ZEBOV to detect more.) PCR testing was done for some individuals, all came back negative, results not given by species.						21	0	0	0	21	0	0
universal	Hipposideros_larvatus	0	0	1	0	0			0	33	FILO-L	33			Wacharapluesadee et al. 2015	Used consensus primer (FILO-L) for all filoviruses						0	33	0	0	33	0	0
universal	Hipposideros_lekaguli	0	0	1	0	0			0	158	FILO-L	158			Wacharapluesadee et al. 2015	Used consensus primer (FILO-L) for all filoviruses						0	158	0	0	158	0	0
RESTV	Hipposideros_pomona	0	0	1	0	0	3	39	see note	see note	FILO-L	39			Yuan et al. 2012	Screen RESTV only, Ab+ retested with RESTV and ZEBOV (authors recommend 1:1 RESTV:ZEBOV to detect more.) PCR testing was done for some individuals, all came back negative, results not given by species.	Changed from 37 positives to 39					39	0	0	3	39	0	1
ZEBOV	Hipposideros_pomona	0	0	1	0	0	1	39	see note	see note	FILO-L	39			Yuan et al. 2012	Screened with RESTV; 32 RESTV+, 25 ZEBOV Ab+ ELISA and/or WB; not all positives listed by species.						39	0	0	1	39	0	1
BOMV	Hipposideros_ruber	0	0	1	0	0			0	50		50			Goldstein, Tracey, et al. 2018			Sierra Leone				0	50	0	0	50	0	0
Ebolavirus genus	Hipposideros_ruber	0	0	1	0	0			0	50		50			Goldstein, Tracey, et al. 2018			Sierra Leone				0	50	0	0	50	0	0
universal	Hipposideros_ruber	0	0	1	0	0			0	50		50			Goldstein, Tracey, et al. 2018			Sierra Leone				0	50	0	0	50	0	0
ZEBOV	Hipposideros_ruber	0	0	1	0	0	0	17				17	0	17	Breman et al. 1999							17	0	0	0	17	0	0
BOMV	Hipposideros_sp.	0	0						0	1		1			Goldstein, Tracey, et al. 2018			Sierra Leone				0	1	0	0	1	0	0
Ebolavirus genus	Hipposideros_sp.	0	0						0	1		1			Goldstein, Tracey, et al. 2018			Sierra Leone				0	1	0	0	1	0	0
universal	Hipposideros_sp.	0	0						0	1		1			Goldstein, Tracey, et al. 2018			Sierra Leone				0	1	0	0	1	0	0
SUDV	Hipposideros_sp.	0	0				0	1282				1282			De, HM Nys, et al. 2018	This paper tested dried blood spots with a Luminex-based serologic assay adapted for bats. The range of number is due to different cut-off value in Table 4.						1282	0	0	0	1282	0	0
ZEBOV	Hipposideros_sp.	0	0				0	1282				1282			De, HM Nys, et al. 2018	This paper tested dried blood spots with a Luminex-based serologic assay adapted for bats. The range of number is due to different cut-off value in Table 4.						1282	0	0	0	1282	0	0
	Hybomys_univittatus	0	0	0	0	1									Breman et al 1999				0	50	Olson et al. 2012	0	0	50	0	50	0	0
	Hybomys_univittatus	0	0	0	0	1	0	50				50			Breman 1999						Olson et al. 2012	50	0	0	0	50	0	0
	Hylomyscus_carillus	0	0	0	0	1									Leirs et al 1999				0	14	Olson et al. 2012	0	0	14	0	14	0	0
	Hylomyscus_carillus	0	0	0	0	1	0	14				14			Leirs 1999						Olson et al. 2012	14	0	0	0	14	0	0
	Hylomyscus_sp.	0	0	0	0	1									Johnson 1978/Germain 1978				0	1	Olson et al. 2012	0	0	1	0	1	0	0
	Hylomyscus_stella	0	0	0	0	1									Breman et al 1999				0	11	Olson et al. 2012	0	0	11	0	11	0	0
	Hylomyscus_stella	0	0	0	0	1	0	11				11			Breman 1999						Olson et al. 2012	11	0	0	0	11	0	0
ZEBOV	Hypsignathus_monstrosus	0	0	0	1	0	4	17	4	21	FILO-L	21	see note	see note	Leroy et al. 2005	Isolation attempted, all negative, but listed by location not species. Some animals tested for Ab and not PCR and vice-versa. No overlap in PCR/Ab positives, so number of bats positive is Ab+ plus PCR. Several filo primers used in addition to universal.	Only reports positives, doesn't list species for negatives					17	21	0	4	21	0	1
ZEBOV	Hypsignathus_monstrosus	0	0	0	1	0	0	1	0	1	FILO-L	1			Saéz et al. 2015	"Attempts to demonstrate the presence of Ebola antibodies against Ebola viruses were inconclusive"						1	1	0	0	1	0	0
ZEBOV	Hypsignathus_monstrosus	0	0	0	1	0	9	125				125			Pourrut et al. 2009							125	0	0	9	125	0	1
SUDV	Hypsignathus_monstrosus	0	0	0	1	0	2019-02-08	185				185			De, HM Nys, et al. 2018	This paper tested dried blood spots with a Luminex-based serologic assay adapted for bats. The range of number is due to different cut-off value in Table 4.						185	0	0	8	185	0	1
ZEBOV	Hypsignathus_monstrosus	0	0	0	1	0	5	111				111			Pourrut et al. 2007		Originally there were two entries for this species and this citation, with 4/67 and 9/44. Combined to a single line to indicate 5 (4+1) total positive bats out of 111 (67+44) tested					111	0	0	5	111	0	1
screen	Hypsignathus_monstrosus	0	0	0	1	0	4	16				16			Hayman et al. 2012a	Number that reacted to 1:1 RESTV:ZEBOV screen but not to singly	In total, 16 tested and 7 were positive for ebolaviruses. Of those 7, 2 were positive for ZEBOV, 1 was positive for RESTV, and 4 were positive, but the virus species wasn't specified					16	0	0	4	16	0	1
ZEBOV	Hypsignathus_monstrosus	0	0	0	1	0	0-3	185				185			De, HM Nys, et al. 2018	This paper tested dried blood spots with a Luminex-based serologic assay adapted for bats. The range of number is due to different cut-off value in Table 4.						185	0	0	3	185	0	1
ZEBOV	Hypsignathus_monstrosus	0	0	0	1	0	2	16				16			Hayman et al. 2012a		In total, 16 tested and 7 were positive for ebolaviruses. Of those 7, 2 were positive for ZEBOV, 1 was positive for RESTV, and 4 were positive, but the virus species wasn't specified					16	0	0	2	16	0	1
RESTV	Hypsignathus_monstrosus	0	0	0	1	0	1	16				16			Hayman et al. 2012a		In total, 16 tested and 7 were positive for ebolaviruses. Of those 7, 2 were positive for ZEBOV, 1 was positive for RESTV, and 4 were positive, but the virus species wasn't specified					16	0	0	1	16	0	1
ZEBOV	Hypsignathus_monstrosus	0	0	0	1	0	0	1				1	0	1	Germain 1978	Bats may not have been Ab tested- isolation explicitly mentioned, Ab testing suggested by context.						1	0	0	0	1	0	0
ZEBOV	Hypsignathus_monstrosus	0	0	0	1	0	0	3				3			Hayman et al. 2010		Added line in to include a negative					3	0	0	0	3	0	0
SUDV	Kerivoula_sp.	0	0				0	1				1			De, HM Nys, et al. 2018	This paper tested dried blood spots with a Luminex-based serologic assay adapted for bats. The range of number is due to different cut-off value in Table 4.						1	0	0	0	1	0	0
ZEBOV	Kerivoula_sp.	0	0				0	1				1			De, HM Nys, et al. 2018	This paper tested dried blood spots with a Luminex-based serologic assay adapted for bats. The range of number is due to different cut-off value in Table 4.						1	0	0	0	1	0	0
	Lemniscomys_striatus	0	0	0	0	1									Leirs et al 1999				0	249	Olson et al. 2012	0	0	249	0	249	0	0
	Lemniscomys_striatus	0	0	0	0	1									Breman et al 1999				0	30	Olson et al. 2012	0	0	30	0	30	0	0
	Lemniscomys_striatus	0	0	0	0	1									Johnson 1978/Germain 1978				0	1	Olson et al. 2012	0	0	1	0	1	0	0
	Lemniscomys_striatus	0	0	0	0	1	0	30				30			Breman 1999						Olson et al. 2012	30	0	0	0	30	0	0
	Lemniscomys_striatus	0	0	0	0	1	0	280				280			Leirs 1999						Olson et al. 2012	280	0	0	0	280	0	0
ZEBOV	Lissonycteris_angolensis	0	0	0	1	0	0	45	0	45	FILO-L	45			Saéz et al. 2015	"Attempts to demonstrate the presence of Ebola antibodies against Ebola viruses were inconclusive"	Renamed from Myonycteris angolensis					45	45	0	0	45	0	0
universal	Lissonycteris_angolensis	0	0	0	1	0	see note	see note	0	3	FILO-L	3	see note	see note	Swanepoel et al. 2007	Same # of isolation attempts as PCR. More FILO-L sequencing attempts than MARV-specific, but a MARV-specific PCR came back positive (no positives for FILO-L).	Added line					0	3	0	0	3	0	0
ZEBOV	Lissonycteris_angolensis	0	0	0	1	0	0-2	84				84			De, HM Nys, et al. 2018	This paper tested dried blood spots with a Luminex-based serologic assay adapted for bats. The range of number is due to different cut-off value in Table 4.						84	0	0	2	84	0	1
SUDV	Lissonycteris_angolensis	0	0	0	1	0	0	84				84			De, HM Nys, et al. 2018	This paper tested dried blood spots with a Luminex-based serologic assay adapted for bats. The range of number is due to different cut-off value in Table 4.						84	0	0	0	84	0	0
	Lophuromys_flavopunctatus	0	0	0	0	1									Leirs et al 1999				0	1	Olson et al. 2012	0	0	1	0	1	0	0
	Lophuromys_flavopunctatus	0	0	0	0	1	0	1				1			Leirs 1999						Olson et al. 2012	1	0	0	0	1	0	0
	Lophuromys_sikapusi	0	0	0	0	1									Breman et al 1999				0	81	Olson et al. 2012	0	0	81	0	81	0	0
	Lophuromys_sikapusi	0	0	0	0	1									Leirs et al 1999				0	58	Olson et al. 2012	0	0	58	0	58	0	0
	Lophuromys_sikapusi	0	0	0	0	1									Johnson 1978/Germain 1978				0	1	Olson et al. 2012	0	0	1	0	1	0	0
	Lophuromys_sikapusi	0	0	0	0	1	0	81				81			Breman 1999						Olson et al. 2012	81	0	0	0	81	0	0
	Lophuromys_sikapusi	0	0	0	0	1	0	139				139			Leirs 1999						Olson et al. 2012	139	0	0	0	139	0	0
	Loxodonta_africana	0	0	0	0	1									Wittmann et al 2007				0	2	Olson et al. 2012	0	0	2	0	2	1	0
RESTV	Macroglossus_minimus	0	0	0	1	0	0	2				2			Taniguchi et al. 2011							2	0	0	0	2	0	0
universal	Macroglossus_sobrinus	0	0	0	1	0			0	2	FILO-L	2			Wacharapluesadee et al. 2015	Used consensus primer (FILO-L) for all filoviruses						0	2	0	0	2	0	0
RESTV	Macroglossus_sobrinus	0	0	0	1	0	0	1	0	1	FILO-L	1			Olival et al. 2013		Added line					1	1	0	0	1	0	0
screen	Macroglossus_sobrinus	0	0	0	1	0	0	1	0	1	FILO-L	1			Olival et al. 2013	Number that reacted to 1:1 RESTV:ZEBOV screen but not to singly						1	1	0	0	1	0	0
ZEBOV	Macroglossus_sobrinus	0	0	0	1	0	0	1	0	1	FILO-L	1			Olival et al. 2013		Added line					1	1	0	0	1	0	0
	Mandrillus_leucophaeus	0	0	0	0	1									Leroy EM et al. 2004b			Cameroon			Olivero et al. 2017	0	0	0
ZEBOV	Mandrillus_leucophaeus	1	0	0	0	1						0			Ogunro et al. 2018			Zoological garden, University of Ibadan, Oyo StateSouthwest Nigeria				0	0	0
	Mandrillus_sphinx	1	0	0	0	1									Lahm et al. 2007			Elir,ROC			Olivero et al. 2017	0	0	0
	Mandrillus_sphinx	1	0	0	0	1									Lahm et al. 2007			Asso,Gabon			Olivero et al. 2017	0	0	0
	Mandrillus_sphinx	1	0	0	0	1									Lahm et al. 2007			Ngnavome,Gabon			Olivero et al. 2017	0	0	0
	Mandrillus_sphinx	1	0	0	0	1									Lahm et al. 2007			Mbokamabaka,Gabon			Olivero et al. 2017	0	0	0
	Mandrillus_sphinx	1	0	0	0	1									Lahm et al. 2007			M‚kouka,Gabon			Olivero et al. 2017	0	0	0
	Mandrillus_sphinx	1	0	0	0	1									Lahm et al. 2007			Societ‚ de la Haute Mondah,Gabon			Olivero et al. 2017	0	0	0
	Mandrillus_sphinx	1	0	0	0	1									Lahm et al. 2007			Été,ROC			Olivero et al. 2017	0	0	0
	Mandrillus_sphinx	1	0	0	0	1									Lahm et al. 2007			Oua River 1,Gabon			Olivero et al. 2017	0	0	0
	Mandrillus_sphinx	1	0	0	0	1									Lahm et al. 2007			Oua River 2,Gabon			Olivero et al. 2017	0	0	0
	Mandrillus_sphinx	1	0	0	0	1									Lahm et al. 2007			Rougier 1 logging camp,Gabon			Olivero et al. 2017	0	0	0
	Mandrillus_sphinx	1	0	0	0	1									Lahm et al. 2007			Rougier 2 logging camp,Gabon			Olivero et al. 2017	0	0	0
	Mandrillus_sphinx	1	0	0	0	1									Lahm et al. 2007			GEB 2 logging camp,Gabon			Olivero et al. 2017	0	0	0
	Mandrillus_sphinx	1	0	0	0	1									Lahm et al. 2007			Rougier 3 logging camp,Gabon			Olivero et al. 2017	0	0	0
	Mandrillus_sphinx	1	0	0	0	1									Leroy EM et al. 2004b			Cameroon			Olivero et al. 2017	0	0	0
	Manis_tricuspis	0	0	0	0	1									Breman et al 1999				0	66	Olson et al. 2012	0	0	66	0	66	0	0
	Manis_tricuspis	0	0	0	0	1									Leirs et al 1999				0	29	Olson et al. 2012	0	0	29	0	29	0	0
	Manis_tricuspis	0	0	0	0	1	0	66				66			Breman 1999						Olson et al. 2012	66	0	0	0	66	0	0
	Mastomys_natalensis	0	0	0	0	1									Leirs et al 1999				0	62	Olson et al. 2012	0	0	62	0	62	0	0
	Mastomys_natalensis	0	0	0	0	1	0	63				63			Leirs 1999						Olson et al. 2012	63	0	0	0	63	0	0
	Mastomys_sp.	0	0	0	0	1									Breman et al 1999				0	72	Olson et al. 2012	0	0	72	0	72	0	0
	Mastomys_sp.	0	0	0	0	1	0	72				72			Breman 1999						Olson et al. 2012	72	0	0	0	72	0	0
screen	Megaderma_lyra	0	0	1	0	0	4	56	0	56	FILO-L	56			Olival et al. 2013	Number that reacted to 1:1 RESTV:ZEBOV screen but not to singly	Added line					56	56	0	4	56	0	1
RESTV	Megaderma_lyra	0	0	1	0	0	0	56	0	56	FILO-L	56			Olival et al. 2013		Added line					56	56	0	0	56	0	0
ZEBOV	Megaderma_lyra	0	0	1	0	0	0	56	0	56	FILO-L	56			Olival et al. 2013		Added line					56	56	0	0	56	0	0
universal	Megaderma_lyra	0	0	1	0	0			0	1	FILO-L	1			Wacharapluesadee et al. 2015	Used consensus primer (FILO-L) for all filoviruses						0	1	0	0	1	0	0
universal	Megaerops_niphanae	0	0	0	1	0			0	1	FILO-L	1			Wacharapluesadee et al. 2015	Used consensus primer (FILO-L) for all filoviruses						0	1	0	0	1	0	0
ZEBOV	Megaloglossus_woermanni	0	0	0	1	0	0	3	0	3	FILO-L	3			Saéz et al. 2015	"Attempts to demonstrate the presence of Ebola antibodies against Ebola viruses were inconclusive"	Renamed from Megaloglossus azagnyi					3	3	0	0	3	0	0
SUDV	Megaloglossus_woermanni	0	0	0	1	0	0	20				20			De, HM Nys, et al. 2018	This paper tested dried blood spots with a Luminex-based serologic assay adapted for bats. The range of number is due to different cut-off value in Table 4.						20	0	0	0	20	0	0
ZEBOV	Megaloglossus_woermanni	0	0	0	1	0	0	20				20			De, HM Nys, et al. 2018	This paper tested dried blood spots with a Luminex-based serologic assay adapted for bats. The range of number is due to different cut-off value in Table 4.						20	0	0	0	20	0	0
ZEBOV	Megaloglossus_woermanni	0	0	0	1	0	0	38				43	0	43	Leirs et al. 1999							38	0	0	0	43	0	0
ZEBOV	Megaloglossus_woermanni	0	0	0	1	0	0	49				49			Pourrut et al. 2009							49	0	0	0	49	0	0
BOMV	Micropteropus_pusillus	0	0	0	1	0			0	2		2			Goldstein, Tracey, et al. 2018			Sierra Leone				0	2	0	0	2	0	0
Ebolavirus genus	Micropteropus_pusillus	0	0	0	1	0			0	2		2			Goldstein, Tracey, et al. 2018			Sierra Leone				0	2	0	0	2	0	0
universal	Micropteropus_pusillus	0	0	0	1	0			0	2		2			Goldstein, Tracey, et al. 2018			Sierra Leone				0	2	0	0	2	0	0
ZEBOV	Micropteropus_pusillus	0	0	0	1	0	4	197				197			Pourrut et al. 2009							197	0	0	4	197	0	1
SUDV	Micropteropus_pusillus	0	0	0	1	0	0-1	64				64			De, HM Nys, et al. 2018	This paper tested dried blood spots with a Luminex-based serologic assay adapted for bats. The range of number is due to different cut-off value in Table 4.						64	0	0	1	64	0	1
ZEBOV	Micropteropus_pusillus	0	0	0	1	0	0	64				64			De, HM Nys, et al. 2018	This paper tested dried blood spots with a Luminex-based serologic assay adapted for bats. The range of number is due to different cut-off value in Table 4.						64	0	0	0	64	0	0
ZEBOV	Micropteropus_pusillus	0	0	0	1	0	0	78				78	0	78	Leirs et al. 1999							78	0	0	0	78	0	0
RESTV	Miniopterus_australis	0	0	1	0	0	0	8				8			Taniguchi et al. 2011							8	0	0	0	8	0	0
universal	Miniopterus_inflatus	0	0	1	0	0	see note	see note	0	38	FILO-L	38	see note	see note	Swanepoel et al. 2007	Same # of isolation attempts as PCR. More FILO-L sequencing attempts than MARV-specific, but a MARV-specific PCR came back positive (no positives for FILO-L).	Added line					0	38	0	0	38	0	0
ZEBOV	Miniopterus_inflatus	0	0	1	0	0	1	150				150			https://www.eurekalert.org/pub_releases/2019-01/cums-sde012319.php, http://www.sciencemag.org/news/2019/01/bat-species-may-be-source-ebola-epidemic-killed-more-11000-people-west-africa, https://www.ecohealthalliance.org/2019/01/ecohealth-alliance-scientists-discover-the-deadly-zaire-ebola-virus-in-west-african-bat, https://www.washingtonpost.com/health/2019/01/24/scientists-find-deadly-ebola-viru…			northeastern Liberia				150	0	0	1	150	0	1
RESTV	Miniopterus_macrotarsus	0	0	1	0	0	0	1				1			Taniguchi et al. 2011							1	0	0	0	1	0	0
universal	Miniopterus_magnate	0	0	1	0	0			0	132	FILO-L	132			Wacharapluesadee et al. 2015	Used consensus primer (FILO-L) for all filoviruses						0	132	0	0	132	0	0
ZEBOV	Miniopterus_minor	0	0	1	0	0	0	2				2	0	2	Leirs et al. 1999							2	0	0	0	2	0	0
universal	Miniopterus_pusillus	0	0	1	0	0			0	1	FILO-L	1			Wacharapluesadee et al. 2015	Used consensus primer (FILO-L) for all filoviruses						0	1	0	0	1	0	0
RESTV	Miniopterus_schreibersii	0	0	1	0	0	2	23	see note	see note	FILO-L	23			Yuan et al. 2012	Screen RESTV only, Ab+ retested with RESTV and ZEBOV (authors recommend 1:1 RESTV:ZEBOV to detect more.) PCR testing was done for some individuals, all came back negative, results not given by species.						23	0	0	2	23	0	1
ZEBOV	Miniopterus_schreibersii	0	0	1	0	0	1	23	see note	see note	FILO-L	23			Yuan et al. 2012	Screened with RESTV; 32 RESTV+, 25 ZEBOV Ab+ ELISA and/or WB; not all positives listed by species.						23	0	0	1	23	0	1
RESTV	Miniopterus_schreibersii	0	0	1	0	0	0	44	3	44	RESTV-NP	44			Jayme et al. 2015	Screened 1:1, came back Ab-. At most 44 indivisduals tested; not all abts had all samples taken and authors did not specify.						44	44	0	3	44	0	1
universal	Miniopterus_schreibersii	0	0	1	0	0			0	22	FILO-L	22			Wacharapluesadee et al. 2015	Used consensus primer (FILO-L) for all filoviruses						0	22	0	0	22	0	0
RESTV	Miniopterus_schreibersii	0	0	1	0	0	0	8				8			Taniguchi et al. 2011							8	0	0	0	8	0	0
SUDV	Miniopterus_sp.	0	0				0	232				232			De, HM Nys, et al. 2018	This paper tested dried blood spots with a Luminex-based serologic assay adapted for bats. The range of number is due to different cut-off value in Table 4.						232	0	0	0	232	0	0
ZEBOV	Miniopterus_sp.	0	0				0	232				232			De, HM Nys, et al. 2018	This paper tested dried blood spots with a Luminex-based serologic assay adapted for bats. The range of number is due to different cut-off value in Table 4.						232	0	0	0	232	0	0
RESTV	Miniopterus_tristis	0	0	1	0	0	0	1				1			Taniguchi et al. 2011							1	0	0	0	1	0	0
BOMV	Molossus_sp.	0	0	0	0	1			0	1		1			Goldstein, Tracey, et al. 2018			Sierra Leone				0	1	0	0	1	0	0
Ebolavirus genus	Molossus_sp.	0	0	0	0	1			0	1		1			Goldstein, Tracey, et al. 2018			Sierra Leone				0	1	0	0	1	0	0
universal	Molossus_sp.	0	0	0	0	1			0	1		1			Goldstein, Tracey, et al. 2018			Sierra Leone				0	1	0	0	1	0	0
	Monkeys_(Primates)	0	0	0	0	1									Lahm et al. 2007			GEB 1 logging camp,Gabon			Olivero et al. 2017	0	0	0
	Monkeys_(Primates)	0	0	0	0	1									Lahm et al. 2007			GEB 2 logging camp,Gabon			Olivero et al. 2017	0	0	0
	Monkeys_(Primates)	0	0	0	0	1									Lahm et al. 2007			Lossi Santuary,ROC			Olivero et al. 2017	0	0	0
	Monkeys_(Primates)	0	0	0	0	1									Lahm et al. 2007			Lambaréné,Gabon			Olivero et al. 2017	0	0	0
BOMV	Mops_condylurus	0	0	1	0	0			1	52		52			Goldstein, Tracey, et al. 2018			Sierra Leone				0	52	0	1	52	0	1
universal	Mops_condylurus	0	0	1	0	0			1	52		52			Goldstein, Tracey, et al. 2018			Sierra Leone				0	52	0	1	52	0	1
Ebolavirus genus	Mops_condylurus	0	0	1	0	0			0	52		52			Goldstein, Tracey, et al. 2018			Sierra Leone				0	52	0	0	52	0	0
ZEBOV	Mops_condylurus	0	0	1	0	0	0	1	0	1	FILO-L	1			Saéz et al. 2015	"Attempts to demonstrate the presence of Ebola antibodies against Ebola viruses were inconclusive"						1	1	0	0	1	0	0
ZEBOV	Mops_condylurus	0	0	1	0	0	3	24				24			Pourrut et al. 2009	H. gigas samples were pooled with M. condylurus samples in this study; positive results are for the pooled sample containing both species.	test included Hipposideros gigas, unclear how many individuals of this species contributed to seropositivity					24	0	0	3	24	0	1
ZEBOV	Mops_condylurus	0	0	1	0	0	0	10				10	0	10	Leirs et al. 1999							10	0	0	0	10	0	0
ZEBOV	Mops_condylurus	0	0	1	0	0	0	54				54	0	54	Breman et al. 1999							54	0	0	0	54	0	0
ZEBOV	Mops_congicus	0	0	1	0	0	0	20				20	0	20	Breman et al. 1999							20	0	0	0	20	0	0
ZEBOV	Mops_nanulus	0	0	1	0	0	0	14				14	0	14	Leirs et al. 1999							14	0	0	0	14	0	0
ZEBOV	Mops_nanulus	0	0	1	0	0	0	15				15	0	15	Breman et al. 1999		Corrected spelling					15	0	0	0	15	0	0
ZEBOV	Mops_niveiventer	0	0	1	0	0	0	3				3	0	3	Leirs et al. 1999							3	0	0	0	3	0	0
ZEBOV	Mops_sp.	0	0				2019-01-06	494				494			De, HM Nys, et al. 2018	This paper tested dried blood spots with a Luminex-based serologic assay adapted for bats. The range of number is due to different cut-off value in Table 4.						494	0	0	6	494	0	1
SUDV	Mops_sp.	0	0				0-2	494				494			De, HM Nys, et al. 2018	This paper tested dried blood spots with a Luminex-based serologic assay adapted for bats. The range of number is due to different cut-off value in Table 4.						494	0	0	2	494	0	1
ZEBOV	Mops_thersites	0	0	1	0	0	0	1				1	0	1	Leirs et al. 1999							1	0	0	0	1	0	0
ZEBOV	Mops_thersites	0	0	1	0	0	0	69				69	0	69	Breman et al. 1999							69	0	0	0	69	0	0
	Mungos_mungo	0	0	0	0	1									Leirs et al 1999				0	1	Olson et al. 2012	0	0	1	0	1	0	0
	Mus_minutoides	0	0	0	0	1									Leirs et al 1999				0	289	Olson et al. 2012	0	0	289	0	289	0	0
	Mus_minutoides	0	0	0	0	1	0	293				293			Leirs 1999						Olson et al. 2012	293	0	0	0	293	0	0
universal	Mus_setulosus	0	0	0	0	1			4	40	EBO-1, EBO-2, EBO-3, EBO-4	40			Morvan JM et al. 1999			Salo, CAR			Olivero et al. 2017	0	40	0	4	40	0	1
	Mus_triton	0	0	0	0	1									Leirs et al 1999				0	459	Olson et al. 2012	0	0	459	0	459	0	0
	Mus_triton	0	0	0	0	1	0	460				460			Leirs 1999						Olson et al. 2012	460	0	0	0	460	0	0
BOMV	Myonycteris_angolensis	0	0	0	1	0			0	14		14			Goldstein, Tracey, et al. 2018			Sierra Leone				0	14	0	0	14	0	0
Ebolavirus genus	Myonycteris_angolensis	0	0	0	1	0			0	14		14			Goldstein, Tracey, et al. 2018			Sierra Leone				0	14	0	0	14	0	0
universal	Myonycteris_angolensis	0	0	0	1	0			0	14		14			Goldstein, Tracey, et al. 2018			Sierra Leone				0	14	0	0	14	0	0
ZEBOV	Myonycteris_leptodon	0	0	0	1	0	0	21	0	21	FILO-L	21			Saéz et al. 2015	"Attempts to demonstrate the presence of Ebola antibodies against Ebola viruses were inconclusive"						21	21	0	0	21	0	0
ZEBOV	Myonycteris_torquata	0	0	0	1	0	4	58	4	141	FILO-L	141	see note	see note	Leroy et al. 2005	Isolation attempted, all negative, but listed by location not species. Some animals tested for Ab and not PCR and vice-versa. No overlap in PCR/Ab positives, so number of bats positive is Ab+ plus PCR. Several filo primers used in addition to universal.	Only reports positives, doesn't list species for negatives					58	141	0	4	141	0	1
ZEBOV	Myonycteris_torquata	0	0	0	1	0	19	573				573			Pourrut et al. 2009		(From Pourrut et al. 2009 citations, I deleted six lines, all for MARV. They were Hipposideros_caffer 0/10, Hipposideros_commersoni 0/16, Lissonycteris_angolensis 0/3, Miniopterus_inflatus 0/34, Miniopterus_pusillus 1/177, and Nycteris_hispida 0/1 as these data were not in the paper)					573	0	0	19	573	0	1
ZEBOV	Myonycteris_torquata	0	0	0	1	0	10	554				554			Pourrut et al. 2007		Originally there were two entries for this species and this citation, with 1/323 and 9/231. Combined to a single line to indicate 10 (9+1) total positive bats out of (231+323) tested					554	0	0	10	554	0	1
SUDV	Myonycteris_torquata	0	0	0	1	0	0	56				56			De, HM Nys, et al. 2018	This paper tested dried blood spots with a Luminex-based serologic assay adapted for bats. The range of number is due to different cut-off value in Table 4.						56	0	0	0	56	0	0
ZEBOV	Myonycteris_torquata	0	0	0	1	0	0	56				56			De, HM Nys, et al. 2018	This paper tested dried blood spots with a Luminex-based serologic assay adapted for bats. The range of number is due to different cut-off value in Table 4.						56	0	0	0	56	0	0
ZEBOV	Myopterus_whitleyi	0	0	1	0	0	0	1				2	0	2	Leirs et al. 1999							1	0	0	0	2	0	0
BOMV	Myotis_bocagii	0	0	1	0	0			0	3		3			Goldstein, Tracey, et al. 2018			Sierra Leone				0	3	0	0	3	0	0
Ebolavirus genus	Myotis_bocagii	0	0	1	0	0			0	3		3			Goldstein, Tracey, et al. 2018			Sierra Leone				0	3	0	0	3	0	0
universal	Myotis_bocagii	0	0	1	0	0			0	3		3			Goldstein, Tracey, et al. 2018			Sierra Leone				0	3	0	0	3	0	0
ZEBOV	Myotis_bocagii	0	0	1	0	0	0	17				17	0	17	Breman et al. 1999		Corrected spelling					17	0	0	0	17	0	0
ZEBOV	Myotis_bocagii	0	0	1	0	0	0	22				22	0	22	Leirs et al. 1999		Corrected spelling					22	0	0	0	22	0	0
SUDV	Myotis_bocagii	0	0	1			0	3				3			De, HM Nys, et al. 2018	This paper tested dried blood spots with a Luminex-based serologic assay adapted for bats. The range of number is due to different cut-off value in Table 4.						3	0	0	0	3	0	0
ZEBOV	Myotis_bocagii	0	0	1			0	3				3			De, HM Nys, et al. 2018	This paper tested dried blood spots with a Luminex-based serologic assay adapted for bats. The range of number is due to different cut-off value in Table 4.						3	0	0	0	3	0	0
RESTV	Myotis_chinensis	0	0	1	0	0	0	6	see note	see note	FILO-L	6			Yuan et al. 2012	Screen RESTV only, Ab+ retested with RESTV and ZEBOV (authors recommend 1:1 RESTV:ZEBOV to detect more.) PCR testing was done for some individuals, all came back negative, results not given by species.						6	0	0	0	6	0	0
RESTV	Myotis_daubentonii	0	0	1	0	0	0	24	see note	see note	FILO-L	24			Yuan et al. 2012	Screen RESTV only, Ab+ retested with RESTV and ZEBOV (authors recommend 1:1 RESTV:ZEBOV to detect more.) PCR testing was done for some individuals, all came back negative, results not given by species.						24	0	0	0	24	0	0
RESTV	Myotis_davidii	0	0	1	0	0	0	5	see note	see note	FILO-L	5			Yuan et al. 2012	Screen RESTV only, Ab+ retested with RESTV and ZEBOV (authors recommend 1:1 RESTV:ZEBOV to detect more.) PCR testing was done for some individuals, all came back negative, results not given by species.						5	0	0	0	5	0	0
RESTV	Myotis_fimbriatus	0	0	1	0	0	0	2	see note	see note	FILO-L	2			Yuan et al. 2012	Screen RESTV only, Ab+ retested with RESTV and ZEBOV (authors recommend 1:1 RESTV:ZEBOV to detect more.) PCR testing was done for some individuals, all came back negative, results not given by species.						2	0	0	0	2	0	0
universal	Myotis_horsfieldi	0	0	1	0	0			0	6	FILO-L	6			Wacharapluesadee et al. 2015	Used consensus primer (FILO-L) for all filoviruses						0	6	0	0	6	0	0
universal	Myotis_muricola	0	0	1	0	0			0	1	FILO-L	1			Wacharapluesadee et al. 2015	Used consensus primer (FILO-L) for all filoviruses						0	1	0	0	1	0	0
RESTV	Myotis_ricketti	0	0	1	0	0	4	83	see note	see note	FILO-L	83			Yuan et al. 2012	Screen RESTV only, Ab+ retested with RESTV and ZEBOV (authors recommend 1:1 RESTV:ZEBOV to detect more.) PCR testing was done for some individuals, all came back negative, results not given by species.						83	0	0	4	83	0	1
	Nandinia_binotata	0	0	0	0	1									Leirs et al 1999				0	16	Olson et al. 2012	0	0	16	0	16	0	0
ZEBOV	Nanonycteris_veldkampii	0	0	0	1	0	0	17	0	17	FILO-L	17			Saéz et al. 2015	"Attempts to demonstrate the presence of Ebola antibodies against Ebola viruses were inconclusive"						17	17	0	0	17	0	0
screen	Nanonycteris_veldkampii	0	0	0	1	0	1	4				4			Hayman et al. 2012a	Number that reacted to 1:1 RESTV:ZEBOV screen but not to singly	In total, 4 tested and 1 was positive for ebolavirus, but the virus species wasn't specified					4	0	0	1	4	0	1
RESTV	Nanonycteris_veldkampii	0	0	0	1	0	0	4				4			Hayman et al. 2012a		In total, 4 tested and 1 was positive for ebolavirus, but the virus species wasn't specified					4	0	0	0	4	0	0
ZEBOV	Nanonycteris_veldkampii	0	0	0	1	0	0	4				4			Hayman et al. 2012a		In total, 4 tested and 1 was positive for ebolavirus, but the virus species wasn't specified					4	0	0	0	4	0	0
ZEBOV	Neoromicia_malagasyensis	0	0	1	0	0	0	0				1	0	1	Leirs et al. 1999	No individuals Ab tested (1 isolation attempt)	Renamed from Eptesicus somalicus					0	0	0	0	1	0	0
ZEBOV	Neoromicia_nanus	0	0	1	0	0	0	2				2	0	2	Leirs et al. 1999		Renamed from Pipistrellus nanus					2	0	0	0	2	0	0
ZEBOV	Neoromicia_nanus	0	0	1	0	0	0	73				73	0	73	Breman et al. 1999		Renamed from Pipistrellus nanus					73	0	0	0	73	0	0
BOMV	Neoromicia_rendalli	0	0	1	0	0			0	2		2			Goldstein, Tracey, et al. 2018			Sierra Leone				0	2	0	0	2	0	0
Ebolavirus genus	Neoromicia_rendalli	0	0	1	0	0			0	2		2			Goldstein, Tracey, et al. 2018			Sierra Leone				0	2	0	0	2	0	0
universal	Neoromicia_rendalli	0	0	1	0	0			0	2		2			Goldstein, Tracey, et al. 2018			Sierra Leone				0	2	0	0	2	0	0
SUDV	Neoromicia_sp.	0	0				0	5				5			De, HM Nys, et al. 2018	This paper tested dried blood spots with a Luminex-based serologic assay adapted for bats. The range of number is due to different cut-off value in Table 4.						5	0	0	0	5	0	0
ZEBOV	Neoromicia_sp.	0	0				0	5				5			De, HM Nys, et al. 2018	This paper tested dried blood spots with a Luminex-based serologic assay adapted for bats. The range of number is due to different cut-off value in Table 4.						5	0	0	0	5	0	0
ZEBOV	Neoromicia_tenuipinnis	0	0	1	0	0	0	1				1	0	1	Leirs et al. 1999		Renamed from Eptesicus tenuipinnis					1	0	0	0	1	0	0
	Neotragus_pygmaeus	0	0	1	0	0									Breman et al 1999				0	6	Olson et al. 2012	0	0	6	0	6	0	0
	Neotragus_pygmaeus	0	0	1	0	0	0	6				6			Breman 1999						Olson et al. 2012	6	0	0	0	6	0	0
BOMV	Nycteris_hispida	0	0	1	0	0			0	1		1			Goldstein, Tracey, et al. 2018			Sierra Leone				0	1	0	0	1	0	0
Ebolavirus genus	Nycteris_hispida	0	0	1	0	0			0	1		1			Goldstein, Tracey, et al. 2018			Sierra Leone				0	1	0	0	1	0	0
universal	Nycteris_hispida	0	0	1	0	0			0	1		1			Goldstein, Tracey, et al. 2018			Sierra Leone				0	1	0	0	1	0	0
universal	Nycteris_hispida	0	0	1	0	0	see note	see note	0	1	FILO-L	1	see note	see note	Swanepoel et al. 2007	Same # of isolation attempts as PCR. More FILO-L sequencing attempts than MARV-specific, but a MARV-specific PCR came back positive (no positives for FILO-L).	Added line					0	1	0	0	1	0	0
ZEBOV	Nycteris_hispida	0	0	1	0	0	0	1				2	0	2	Leirs et al. 1999							1	0	0	0	2	0	0
BOMV	Nycteris_sp.	0	0		0	1			0	3		3			Goldstein, Tracey, et al. 2018			Sierra Leone				0	3	0	0	3	0	0
Ebolavirus genus	Nycteris_sp.	0	0		0	1			0	3		3			Goldstein, Tracey, et al. 2018			Sierra Leone				0	3	0	0	3	0	0
universal	Nycteris_sp.	0	0		0	1			0	3		3			Goldstein, Tracey, et al. 2018			Sierra Leone				0	3	0	0	3	0	0
SUDV	Nycteris_sp.	0	0				0	22				22			De, HM Nys, et al. 2018	This paper tested dried blood spots with a Luminex-based serologic assay adapted for bats. The range of number is due to different cut-off value in Table 4.						22	0	0	0	22	0	0
ZEBOV	Nycteris_sp.	0	0				0	22				22			De, HM Nys, et al. 2018	This paper tested dried blood spots with a Luminex-based serologic assay adapted for bats. The range of number is due to different cut-off value in Table 4.						22	0	0	0	22	0	0
	Oenomys_hypoxanthus	0	0	0	0	1									Breman et al 1999				0	82	Olson et al. 2012	0	0	82	0	82	0	0
	Oenomys_hypoxanthus	0	0	0	0	1									Leirs et al 1999				0	1	Olson et al. 2012	0	0	1	0	1	0	0
	Oenomys_hypoxanthus	0	0	0	0	1	0	82				82			Breman 1999						Olson et al. 2012	82	0	0	0	82	0	0
	Oenomys_hypoxanthus	0	0	0	0	1	0	83				83			Leirs 1999						Olson et al. 2012	83	0	0	0	83	0	0
	Ovis_aries	0	0	0	0	1									Leirs et al 1999				0	4	Olson et al. 2012	0	0	4	0	4	0	0
	Pan_paniscus	0	1	0	0	1	0	1				1			Leirs 1999						Olson et al. 2012	1	0	0	0	1	0	0
	Pan_troglodytes	0	1	0	0	1									Wittmann et al 2007				0	4	Olson et al. 2012	0	0	4	0	4	1	0
	Pan_troglodytes	0	1	0	0	1			3	3		3			Rouquet 2005, Leroy 2004 a,b			Gabon & RoC			Olson et al. 2012	0	3	0	3	3	1	1
universal	Pan_troglodytes	0	1	0	0	1	1	1	0	1		1			Leroy EM et al. 2004a			Lossi			Olivero et al. 2017	1	1	0	1	1	1	1
universal	Pan_troglodytes	0	1	0	0	1	1	1	0	1		1			Leroy EM et al. 2004a			Lossi			Olivero et al. 2017	1	1	0	1	1	1	1
universal	Pan_troglodytes	0	1	0	0	1	1	1	1	1		1			Leroy EM et al. 2004a			Lossi			Olivero et al. 2017	1	1	0	1	1	1	1
universal	Pan_troglodytes	0	1	0	0	1	1	1				1			Georges-Coubot, 1997	Immunostaining of Ebola virus antigens		Gabon			Olson et al. 2012	1	0	0	1	1	1	1
ZEBOV	Pan_troglodytes	0	1	0	0	1	0	1				1			Ogunro et al. 2018			Zoological garden, University of Ibadan, Oyo StateSouthwest Nigeria				1	0	0	0	1	0	0
universal	Pan_troglodytes	0	1	0	0	1	0	3				3			Formenty P et al. 1999	3 chimpanzees sampled were negative for antibodies		Täi National Park, Côte d’Ivoire			Olivero et al. 2017	3	0	0	0	3	1	0
	Pan_troglodytes	0	1	0	0	1									Georges et al. 1999			Andock, Gabon			Olivero et al. 2017	0	0	0
	Pan_troglodytes	0	1	0	0	1									Georges et al. 1999			Boou‚ Region (Lop‚ NP), Gabon			Olivero et al. 2017	0	0	0
	Pan_troglodytes	0	1	0	0	1									Lahm et al. 2007			Mbokamabaka,Gabon			Olivero et al. 2017	0	0	0
	Pan_troglodytes	0	1	0	0	1									Lahm et al. 2007			Téka Téka,Gabon			Olivero et al. 2017	0	0	0
	Pan_troglodytes	0	1	0	0	1									Lahm et al. 2007			Citron,Gabon			Olivero et al. 2017	0	0	0
	Pan_troglodytes	0	1	0	0	1									Lahm et al. 2007			Citron,Gabon			Olivero et al. 2017	0	0	0
	Pan_troglodytes	0	1	0	0	1									Lahm et al. 2007			Ayina,Gabon			Olivero et al. 2017	0	0	0
	Pan_troglodytes	0	1	0	0	1									Lahm et al. 2007			Bibeh zone 1,Gabon			Olivero et al. 2017	0	0	0
	Pan_troglodytes	0	1	0	0	1									Lahm et al. 2007			Masoko,Gabon			Olivero et al. 2017	0	0	0
	Pan_troglodytes	0	1	0	0	1									Lahm et al. 2007			Societ‚ de la Haute Mondah,Gabon			Olivero et al. 2017	0	0	0
	Pan_troglodytes	0	1	0	0	1									Lahm et al. 2007			GEB 2 logging camp,Gabon			Olivero et al. 2017	0	0	0
	Pan_troglodytes	0	1	0	0	1									Lahm et al. 2007			Rougier 4 logging camp,Gabon			Olivero et al. 2017	0	0	0
	Pan_troglodytes	0	1	0	0	1									Lahm et al. 2007			Lossi Santuary,ROC			Olivero et al. 2017	0	0	0
	Pan_troglodytes	0	1	0	0	1									Le Guenno B (1995)			Täi National Park, Côte d’Ivoire			Olivero et al. 2017	0	0	0
	Pan_troglodytes	0	1	0	0	1									Le Guenno B (1995)			Täi National Park, Côte d’Ivoire			Olivero et al. 2017	0	0	0
	Pan_troglodytes	0	1	0	0	1									Leroy EM et al. 2004b			Gabon			Olivero et al. 2017	0	0	0
	Pan_troglodytes	0	1	0	0	1									Leroy EM et al. 2004b			ROC			Olivero et al. 2017	0	0	0
	Pan_troglodytes	0	1	0	0	1									Leroy EM et al. 2004b			Cameroon			Olivero et al. 2017	0	0	0
ZEBOV	Pan_troglodytes	0	1	0	0	1						0			Ogunro et al. 2018			Biological garden, University of Ilorin, Kwara StateSouthwest Nigeria				0	0	0
ZEBOV	Papio_anubis	0	0	0	0	1	0	1				1			Ogunro et al. 2018			Agodi gardens, Ibadan, Oyo StateSouthwest Nigeria				1	0	0	0	1	0	0
ZEBOV	Papio_anubis	0	0	0	0	1	0	5				5			Ogunro et al. 2018			Zoological garden, University of Ibadan, Oyo StateSouthwest Nigeria				5	0	0	0	5	0	0
	Papio_anubis	0	0	0	0	1									Leroy EM et al. 2004b			Cameroon			Olivero et al. 2017	0	0	0
ZEBOV	Papio_anubis	0	0	0	0	1						0			Ogunro et al. 2018			Biological garden, University of Ilorin, Kwara StateSouthwest Nigeria				0	0	0
	Paraxerus_alexandri	0	0	0	0	1									Breman et al 1999				0	6	Olson et al. 2012	0	0	6	0	6	0	0
	Paraxerus_alexandri	0	0	0	0	1									Leirs et al 1999				0	1	Olson et al. 2012	0	0	1	0	1	0	0
	Paraxerus_alexandri	0	0	0	0	1	0	6				6			Breman 1999						Olson et al. 2012	6	0	0	0	6	0	0
	Paraxerus_alexandri	0	0	0	0	1	0	7				7			Leirs 1999						Olson et al. 2012	7	0	0	0	7	0	0
	Pelomys_campanae	0	0	0	0	1									Leirs et al 1999				0	32	Olson et al. 2012	0	0	32	0	32	0	0
	Pelomys_campanae	0	0	0	0	1	0	31				31			Leirs 1999						Olson et al. 2012	31	0	0	0	31	0	0
	Pelomys_minor	0	0	0	0	1									Leirs et al 1999				0	21	Olson et al. 2012	0	0	21	0	21	0	0
	Pelomys_minor	0	0	0	0	1	0	21				21			Leirs 1999						Olson et al. 2012	21	0	0	0	21	0	0
	Pelomys_sp.	0	0	0	0	1									Leirs et al 1999				0	7	Olson et al. 2012	0	0	7	0	7	0	0
	Pelomys_sp.	0	0	0	0	1	0	7				7			Leirs 1999						Olson et al. 2012	7	0	0	0	7	0	0
BDBV	Penthetor_lucasi	0	0	0	1	0	see note	70				70			Laing, Eric D., et al. 2018	Fig 1 shows positive samples, but it is hard to count the number.						70	0	0	1	70	0	1
SUDV	Penthetor_lucasi	0	0	0	1	0	see note	70				70			Laing, Eric D., et al. 2018	Fig 1 shows positive samples, but it is hard to count the number.						70	0	0	1	70	0	1
ZEBOV	Penthetor_lucasi	0	0	0	1	0	see note	70				70			Laing, Eric D., et al. 2018	Fig 1 shows positive samples, but it is hard to count the number.						70	0	0	1	70	0	1
Reston ebolavirus–monkey	Penthetor_lucasi	0	0	0	1	0	0	70				70			Laing, Eric D., et al. 2018							70	0	0	0	70	0	0
Reston ebolavirus–pig	Penthetor_lucasi	0	0	0	1	0	0	70				70			Laing, Eric D., et al. 2018							70	0	0	0	70	0	0
TAFV	Penthetor_lucasi	0	0	0	1	0	0	70				70			Laing, Eric D., et al. 2018							70	0	0	0	70	0	0
	Perodicticus_potto	0	0	0	0	1									Leirs et al 1999				0	8	Olson et al. 2012	0	0	8	0	8	0	0
	Perodicticus_potto	1	0	0	0	1	0	8				8			Leirs 1999						Olson et al. 2012	8	0	0	0	8	0	0
	Petrodromus_tetradactylus	0	0	0	0	1									Leirs et al 1999				0	1	Olson et al. 2012	0	0	1	0	1	0	0
	Philantomba_monticola	0	0	0	0	1									Breman et al 1999				0	17	Olson et al. 2012	0	0	17	0	17	0	0
	Philantomba_monticola	0	0	0	0	1									Leirs et al 1999				0	9	Olson et al. 2012	0	0	9	0	9	0	0
	Philantomba_monticola	0	0	0	0	1									Johnson 1978/Germain 1978				0	2	Olson et al. 2012	0	0	2	0	2	0	0
	Philantomba_monticola	0	0	0	0	1	0	17				17			Breman 1999						Olson et al. 2012	17	0	0	0	17	0	0
	Piliocolobus_pennantii	1	0	0	0	1									Leirs et al 1999				0	14	Olson et al. 2012	0	0	14	0	14	0	0
	Piliocolobus_pennantii	1	0	0	0	1	0	14				14			Breman 1999						Olson et al. 2012	14	0	0	0	14	0	0
BOMV	Pipistrellus_nanulus	0	0	1	0	0			0	3		3			Goldstein, Tracey, et al. 2018			Sierra Leone				0	3	0	0	3	0	0
Ebolavirus genus	Pipistrellus_nanulus	0	0	1	0	0			0	3		3			Goldstein, Tracey, et al. 2018			Sierra Leone				0	3	0	0	3	0	0
universal	Pipistrellus_nanulus	0	0	1	0	0			0	3		3			Goldstein, Tracey, et al. 2018			Sierra Leone				0	3	0	0	3	0	0
RESTV	Pipistrellus_pipistrellus	0	0	1	0	0	4	35	see note	see note	FILO-L	35			Yuan et al. 2012	Screen RESTV only, Ab+ retested with RESTV and ZEBOV (authors recommend 1:1 RESTV:ZEBOV to detect more.) PCR testing was done for some individuals, all came back negative, results not given by species.						35	0	0	4	35	0	1
ZEBOV	Pipistrellus_pipistrellus	0	0	1	0	0	2	35	see note	see note	FILO-L	35			Yuan et al. 2012	Screened with RESTV; 32 RESTV+, 25 ZEBOV Ab+ ELISA and/or WB; not all positives listed by species.						35	0	0	2	35	0	1
	Potamochoerus_porcus	0	0	0	0	1									Lahm et al. 2007			Mbokamabaka,Gabon			Olivero et al. 2017	0	0	0
	Potamochoerus_porcus	0	0	0	0	1									Lahm et al. 2007			Mbokamabaka,Gabon			Olivero et al. 2017	0	0	0
	Potamochoerus_porcus	0	0	0	0	1									Lahm et al. 2007			Elir,ROC			Olivero et al. 2017	0	0	0
	Potamochoerus_porcus	0	0	0	0	1									Lahm et al. 2007			Societ‚ de la Haute Mondah,Gabon			Olivero et al. 2017	0	0	0
	Potamochoerus_porcus	0	0	0	0	1									Lahm et al. 2007			Été,ROC			Olivero et al. 2017	0	0	0
	Potamochoerus_porcus	0	0	0	0	1									Lahm et al. 2007			Andok,Gabon			Olivero et al. 2017	0	0	0
	Potamochoerus_porcus	0	0	0	0	1									Lahm et al. 2007			GEB 1 logging camp,Gabon			Olivero et al. 2017	0	0	0
	Potamochoerus_porcus	0	0	0	0	1									Lahm et al. 2007			Makouké,Gabon			Olivero et al. 2017	0	0	0
	Potamochoerus_porcus	0	0	0	0	1									Lahm et al. 2007			Rougier 2 logging camp,Gabon			Olivero et al. 2017	0	0	0
	Potamochoerus_porcus	0	0	0	0	1									Lahm et al. 2007			Lossi Santuary,ROC			Olivero et al. 2017	0	0	0
	Praomys_jacksoni	0	0	0	0	1									Leirs et al 1999				0	241	Olson et al. 2012	0	0	241	0	241	0	0
	Praomys_jacksoni	0	0	0	0	1									Breman et al 1999				0	60	Olson et al. 2012	0	0	60	0	60	0	0
	Praomys_jacksoni	0	0	0	0	1	0	60				60			Breman 1999						Olson et al. 2012	60	0	0	0	60	0	0
	Praomys_jacksoni	0	0	0	0	1	0	304				304			Leirs 1999						Olson et al. 2012	304	0	0	0	304	0	0
	Praomys_lukolelae	0	0	0	0	1									Leirs et al 1999				0	36	Olson et al. 2012	0	0	36	0	36	0	0
	Praomys_lukolelae	0	0	0	0	1	0	36				36			Leirs 1999						Olson et al. 2012	36	0	0	0	36	0	0
	Praomys_sp.	0	0	0	0	1									Johnson 1978/Germain 1978				0	69	Olson et al. 2012	0	0	69	0	69	0	0
universal	Praomys_sp.	0	0	0	0	1			1	12	EBO-1, EBO-2, EBO-3, EBO-4	12			Morvan JM et al. 1999			Batouri, CAR			Olivero et al. 2017	0	12	0	1	12	0	1
universal	Praomys_sp.	0	0	0	0	1			1	4	EBO-1, EBO-2, EBO-3, EBO-4	4			Morvan JM et al. 1999			Salo, CAR			Olivero et al. 2017	0	4	0	1	4	0	1
	Praomys_tullbergi	0	0	0	0	1									Breman et al 1999				0	7	Olson et al. 2012	0	0	7	0	7	0	0
	Praomys_tullbergi	0	0	0	0	1	0	7				7			Breman 1999						Olson et al. 2012	7	0	0	0	7	0	0
	Protoxerus_sp.	0	0	0	0	1									Leirs et al 1999				0	1	Olson et al. 2012	0	0	1	0	1	0	0
	Protoxerus_stangeri	0	0	0	0	1	0	1				1			Leirs 1999						Olson et al. 2012	1	0	0	0	1	0	0
RESTV	Ptenochirus_jagori	0	0	0	1	0	0	38				38			Taniguchi et al. 2011							38	0	0	0	38	0	0
ZEBOV	Pteropus_lylei	0	0	0	1	0	0	500				500			Wacharapluesadee et al. 2015							500	0	0	0	500	0	0
RESTV	Pteropus_vampyrus	0	0	0	1	0	1	5	0	5	RESTV-NP	5			Jayme et al. 2015	Screened 1:1, came back more specifically positive.						5	5	0	1	5	0	1
ZEBOV	Pteropus_vampyrus	0	0	0	1	0	0	5				5			Jayme et al. 2015	Screened 1:1, came back more specifically positive.						5	0	0	0	5	0	0
	Rattus_rattus	0	0	0	0	1									Leirs et al 1999				0	89	Olson et al. 2012	0	0	89	0	89	0	0
	Rattus_rattus	0	0	0	0	1									Breman et al 1999				0	52	Olson et al. 2012	0	0	52	0	52	0	0
	Rattus_rattus	0	0	0	0	1									Johnson 1978/Germain 1978				0	30	Olson et al. 2012	0	0	30	0	30	0	0
	Rattus_rattus	0	0	0	0	1	0	52				52			Breman 1999						Olson et al. 2012	52	0	0	0	52	0	0
	Rattus_rattus	0	0	0	0	1	0	139				139			Leirs 1999						Olson et al. 2012	139	0	0	0	139	0	0
RESTV	Rhinolophus_affinis	0	0	1	0	0	1	69	see note	see note	FILO-L	69			Yuan et al. 2012	Screen RESTV only, Ab+ retested with RESTV and ZEBOV (authors recommend 1:1 RESTV:ZEBOV to detect more.) PCR testing was done for some individuals, all came back negative, results not given by species.						69	0	0	1	69	0	1
RESTV	Rhinolophus_arcuatus	0	0	1	0	0	0	1				1			Taniguchi et al. 2011							1	0	0	0	1	0	0
universal	Rhinolophus_coelophyllus	0	0	1	0	0			0	7	FILO-L	7			Wacharapluesadee et al. 2015	Used consensus primer (FILO-L) for all filoviruses						0	7	0	0	7	0	0
universal	Rhinolophus_eloquens	0	0	1	0	0	see note	see note	0	222	FILO-L	222	see note	see note	Swanepoel et al. 2007	Same # of isolation attempts as PCR. More FILO-L sequencing attempts than MARV-specific, but a MARV-specific PCR came back positive (no positives for FILO-L).	Corrected from 20 positive out of 209 tested; Note that 20/206 were positive by ELISA and 7/197 were positive by nested VP35 RT-PCR. Because I can't tell whether the 7 that were positive by nested VP35 RT-PCR were included in the 20 positive by ELISA, being conservative and just saying 20 positive total					0	222	0	0	222	0	0
RESTV	Rhinolophus_ferrumequinum	0	0	1	0	0	0	15	see note	see note	FILO-L	15			Yuan et al. 2012	Screen RESTV only, Ab+ retested with RESTV and ZEBOV (authors recommend 1:1 RESTV:ZEBOV to detect more.) PCR testing was done for some individuals, all came back negative, results not given by species.						15	0	0	0	15	0	0
BOMV	Rhinolophus_fumigatus	0	0	1	0	0			0	3		3			Goldstein, Tracey, et al. 2018			Sierra Leone				0	3	0	0	3	0	0
Ebolavirus genus	Rhinolophus_fumigatus	0	0	1	0	0			0	3		3			Goldstein, Tracey, et al. 2018			Sierra Leone				0	3	0	0	3	0	0
universal	Rhinolophus_fumigatus	0	0	1	0	0			0	3		3			Goldstein, Tracey, et al. 2018			Sierra Leone				0	3	0	0	3	0	0
BOMV	Rhinolophus_landeri	0	0	1	0	0			0	1		1			Goldstein, Tracey, et al. 2018			Sierra Leone				0	1	0	0	1	0	0
Ebolavirus genus	Rhinolophus_landeri	0	0	1	0	0			0	1		1			Goldstein, Tracey, et al. 2018			Sierra Leone				0	1	0	0	1	0	0
universal	Rhinolophus_landeri	0	0	1	0	0			0	1		1			Goldstein, Tracey, et al. 2018			Sierra Leone				0	1	0	0	1	0	0
universal	Rhinolophus_landeri	0	0	1	0	0	see note	see note	0	1	FILO-L	1	see note	see note	Swanepoel et al. 2007	Same # of isolation attempts as PCR. More FILO-L sequencing attempts than MARV-specific, but a MARV-specific PCR came back positive (no positives for FILO-L).	Added line					0	1	0	0	1	0	0
universal	Rhinolophus_luctus	0	0	1	0	0			0	1	FILO-L	1			Wacharapluesadee et al. 2015	Used consensus primer (FILO-L) for all filoviruses						0	1	0	0	1	0	0
universal	Rhinolophus_malayanus	0	0	1	0	0			0	4	FILO-L	4			Wacharapluesadee et al. 2015	Used consensus primer (FILO-L) for all filoviruses						0	4	0	0	4	0	0
universal	Rhinolophus_microglobosus	0	0	1	0	0			0	1	FILO-L	1			Wacharapluesadee et al. 2015	Used consensus primer (FILO-L) for all filoviruses						0	1	0	0	1	0	0
RESTV	Rhinolophus_pearsonii	0	0	1	0	0	0	3	see note	see note	FILO-L	3			Yuan et al. 2012	Screen RESTV only, Ab+ retested with RESTV and ZEBOV (authors recommend 1:1 RESTV:ZEBOV to detect more.) PCR testing was done for some individuals, all came back negative, results not given by species.						3	0	0	0	3	0	0
RESTV	Rhinolophus_pusillus	0	0	1	0	0	0	14	see note	see note	FILO-L	14			Yuan et al. 2012	Screen RESTV only, Ab+ retested with RESTV and ZEBOV (authors recommend 1:1 RESTV:ZEBOV to detect more.) PCR testing was done for some individuals, all came back negative, results not given by species.						14	0	0	0	14	0	0
universal	Rhinolophus_pusillus	0	0	1	0	0			0	1	FILO-L	1			Wacharapluesadee et al. 2015	Used consensus primer (FILO-L) for all filoviruses						0	1	0	0	1	0	0
RESTV	Rhinolophus_rufus	0	0	1	0	0	0	2				2			Taniguchi et al. 2011							2	0	0	0	2	0	0
universal	Rhinolophus_shameli	0	0	1	0	0			0	44	FILO-L	44			Wacharapluesadee et al. 2015	Used consensus primer (FILO-L) for all filoviruses						0	44	0	0	44	0	0
RESTV	Rhinolophus_sinicus	0	0	1	0	0	0	6	see note	see note	FILO-L	6			Yuan et al. 2012	Screen RESTV only, Ab+ retested with RESTV and ZEBOV (authors recommend 1:1 RESTV:ZEBOV to detect more.) PCR testing was done for some individuals, all came back negative, results not given by species.	Spelling corrected from Rhinolophus sinics					6	0	0	0	6	0	0
SUDV	Rhinolophus_sp.	0	0				0	86				86			De, HM Nys, et al. 2018	This paper tested dried blood spots with a Luminex-based serologic assay adapted for bats. The range of number is due to different cut-off value in Table 4.						86	0	0	0	86	0	0
ZEBOV	Rhinolophus_sp.	0	0				0	86				86			De, HM Nys, et al. 2018	This paper tested dried blood spots with a Luminex-based serologic assay adapted for bats. The range of number is due to different cut-off value in Table 4.						86	0	0	0	86	0	0
BOMV	Rhinopoma_microphyllum	0	0	1	0	0			0	1		1			Goldstein, Tracey, et al. 2018			Sierra Leone				0	1	0	0	1	0	0
Ebolavirus genus	Rhinopoma_microphyllum	0	0	1	0	0			0	1		1			Goldstein, Tracey, et al. 2018			Sierra Leone				0	1	0	0	1	0	0
universal	Rhinopoma_microphyllum	0	0	1	0	0			0	1		1			Goldstein, Tracey, et al. 2018			Sierra Leone				0	1	0	0	1	0	0
	Rhynchocyon_cirnei	0	0	0	0	1									Breman et al 1999				0	28	Olson et al. 2012	0	0	28	0	28	0	0
	Rhynchocyon_cirnei	0	0	0	0	1	0	28				28			Breman 1999						Olson et al. 2012	28	0	0	0	28	0	0
universal	Rousettus_aegyptiacus	0	0	0	1	0	see note	see note	0	230	FILO-L	230	see note	see note	Swanepoel et al. 2007	Same # of isolation attempts as PCR. More FILO-L sequencing attempts than MARV-specific, but a MARV-specific PCR came back positive (no positives for FILO-L).	Corrected 35 positives out of 156 tested; Note that 32/156 were positive by ELISA and 4/127 were positive by nested VP35 RT-PCR. Because I can't tell whether the 4 that were positive by nested VP35 RT-PCR were included in the 32 positive by ELISA, being conservative and just saying 32 positive total					0	230	0	0	230	0	0
ZEBOV	Rousettus_aegyptiacus	0	0	0	1	0	24	307				307			Pourrut et al. 2009							307	0	0	24	307	0	1
ZEBOV	Rousettus_aegyptiacus	0	0	0	1	0	0-9	359				359			De, HM Nys, et al. 2018	This paper tested dried blood spots with a Luminex-based serologic assay adapted for bats. The range of number is due to different cut-off value in Table 4.						359	0	0	9	359	0	1
SUDV	Rousettus_aegyptiacus	0	0	0	1	0	0-5	359				359			De, HM Nys, et al. 2018	This paper tested dried blood spots with a Luminex-based serologic assay adapted for bats. The range of number is due to different cut-off value in Table 4.						359	0	0	5	359	0	1
RESTV	Rousettus_amplexicaudatus	0	0	0	1	0	7	16	0	16	RESTV-NP	16			Taniguchi et al. 2011		Changed from 5 positives to 7 positives					16	16	0	7	16	0	1
universal	Rousettus_amplexicaudatus	0	0	0	1	0			0	3	FILO-L	3			Wacharapluesadee et al. 2015	Used consensus primer (FILO-L) for all filoviruses						0	3	0	0	3	0	0
RESTV	Rousettus_leschenaultii	0	0	0	1	0	11	126	see note	see note	FILO-L	126			Yuan et al. 2012	Screen RESTV only, Ab+ retested with RESTV and ZEBOV (authors recommend 1:1 RESTV:ZEBOV to detect more.) PCR testing was done for some individuals, all came back negative, results not given by species.						126	0	0	11	126	0	1
ZEBOV	Rousettus_leschenaultii	0	0	0	1	0	10	126	see note	see note	FILO-L	126			Yuan et al. 2012	Screened with RESTV; 32 RESTV+, 25 ZEBOV Ab+ ELISA and/or WB; not all positives listed by species.						126	0	0	10	126	0	1
screen	Rousettus_leschenaultii	0	0	0	1	0	15	141	0	141	FILO-L	141			Olival et al. 2013	Number that reacted to 1:1 RESTV:ZEBOV screen but not to singly	Changed to 5 positives, instead of 15 (15 were "potentially positive after initial screening" and 5 were "confirmed as seropositive after testing by ELISA and Western blotting"). If going off just western blot, might be more					141	141	0	15	141	0	1
ZEBOV	Rousettus_leschenaultii	0	0	0	1	0	4	141	0	141	FILO-L	141			Olival et al. 2013		Changed to 5 positives, instead of 15 (15 were "potentially positive after initial screening" and 5 were "confirmed as seropositive after testing by ELISA and Western blotting"). If going off just western blot, might be more					141	141	0	4	141	0	1
RESTV	Rousettus_leschenaultii	0	0	0	1	0	1	141	0	141	FILO-L	141			Olival et al. 2013	One sample more reactive to RESTV than ZEBOV	Changed to 1 positives, instead of 15 (used western blot for determination. If going off of Western Blot might be more)					141	141	0	1	141	0	1
	Rousettus_leschenaultii	0	0	0	1	0			1	29	FILO-L	29			He et al. 2015	Filoviral primer returned virus with previously-unseen sequence; clusters with Ebolaviruses, basal to the EBOV/LLOV clade.						0	29	0	1	29	0	1
ZEBOV	Saccolaimus_peli	0	0	1	0	0	0	9				9	0	9	Breman et al. 1999		Renamed from Taphozous peli					9	0	0	0	9	0	0
SUDV	Scotonycteris_zenkeri	0	0	0	1	0	0	1				1			De, HM Nys, et al. 2018	This paper tested dried blood spots with a Luminex-based serologic assay adapted for bats. The range of number is due to different cut-off value in Table 4.						1	0	0	0	1	0	0
ZEBOV	Scotonycteris_zenkeri	0	0	0	1	0	0	1				1			De, HM Nys, et al. 2018	This paper tested dried blood spots with a Luminex-based serologic assay adapted for bats. The range of number is due to different cut-off value in Table 4.						1	0	0	0	1	0	0
ZEBOV	Scotophilus_dinganii	0	0	1	0	0	0	19				20	0	20	Leirs et al. 1999							19	0	0	0	20	0	0
RESTV	Scotophilus_kuhlii	0	0	1	0	0	1	25	see note	see note	FILO-L	25			Yuan et al. 2012	Screen RESTV only, Ab+ retested with RESTV and ZEBOV (authors recommend 1:1 RESTV:ZEBOV to detect more.) PCR testing was done for some individuals, all came back negative, results not given by species.						25	0	0	1	25	0	1
universal	Scotophilus_kuhlii	0	0	1	0	0			0	1	FILO-L	1			Wacharapluesadee et al. 2015	Used consensus primer (FILO-L) for all filoviruses						0	1	0	0	1	0	0
RESTV	Scotophilus_kuhlii	0	0	1	0	0	0	5				5			Taniguchi et al. 2011							5	0	0	0	5	0	0
SUDV	Scotophilus_sp.	0	0				0	22				22			De, HM Nys, et al. 2018	This paper tested dried blood spots with a Luminex-based serologic assay adapted for bats. The range of number is due to different cut-off value in Table 4.						22	0	0	0	22	0	0
ZEBOV	Scotophilus_sp.	0	0				0	22				22			De, HM Nys, et al. 2018	This paper tested dried blood spots with a Luminex-based serologic assay adapted for bats. The range of number is due to different cut-off value in Table 4.						22	0	0	0	22	0	0
BOMV	Scotophilus_viridis	0	0	1	0	0			0	26		26			Goldstein, Tracey, et al. 2018			Sierra Leone				0	26	0	0	26	0	0
Ebolavirus genus	Scotophilus_viridis	0	0	1	0	0			0	26		26			Goldstein, Tracey, et al. 2018			Sierra Leone				0	26	0	0	26	0	0
universal	Scotophilus_viridis	0	0	1	0	0			0	26		26			Goldstein, Tracey, et al. 2018			Sierra Leone				0	26	0	0	26	0	0
	Scutisorex_somereni	0	0	0	0	1									Breman et al 1999				0	6	Olson et al. 2012	0	0	6	0	6	0	0
	Scutisorex_somereni	0	0	0	0	1	0	2				2			Leirs 1999						Olson et al. 2012	2	0	0	0	2	0	0
	Steatomys_pratensis	0	0	0	0	1									Leirs et al 1999				0	16	Olson et al. 2012	0	0	16	0	16	0	0
	Steatomys_pratensis	0	0	0	0	1	0	16				16			Leirs 1999						Olson et al. 2012	16	0	0	0	16	0	0
	Stochomys_sp.	0	0	0	0	1									Breman et al 1999				0	8	Olson et al. 2012	0	0	8	0	8	0	0
	Stochomys_sp.	0	0	0	0	1	0	8				8			Breman 1999						Olson et al. 2012	8	0	0	0	8	0	0
	Sus_scrofa	0	0	0	0	1									Johnson 1978/Germain 1978				0	10	Olson et al. 2012	0	0	10	0	10	0	0
	Sus_scrofa	0	0	0	0	1									Leirs et al 1999				0	2	Olson et al. 2012	0	0	2	0	2	0	0
	Sylvicapra_grimmia	0	0	0	0	1									Leirs et al 1999				0	4	Olson et al. 2012	0	0	4	0	4	0	0
universal	Sylvisorex_ollula	0	0	0	0	1			1	7	EBO-1, EBO-2, EBO-3, EBO-4	7			Morvan JM et al. 1999			Batouri, CAR			Olivero et al. 2017	0	7	0	1	7	0	1
	Syncerus_caffer	0	0	0	0	1									Wittmann et al 2007				0	4	Olson et al. 2012	0	0	4	0	4	1	0
universal	Taphozous_longimanus	0	0	1	0	0			0	27	FILO-L	27			Wacharapluesadee et al. 2015	Used consensus primer (FILO-L) for all filoviruses						0	27	0	0	27	0	0
universal	Taphozous_melanopogon	0	0	1	0	0			0	110	FILO-L	110			Wacharapluesadee et al. 2015	Used consensus primer (FILO-L) for all filoviruses						0	110	0	0	110	0	0
	Tatera_sp,	0	0	0	0	1	0	3				3			Leirs 1999						Olson et al. 2012	3	0	0	0	3	0	0
	Tatera_sp.	0	0	0	0	1									Leirs et al 1999				0	3	Olson et al. 2012	0	0	3	0	3	0	0
	Thryonomys_swinderianus	0	0	0	0	1									Leirs et al 1999				0	18	Olson et al. 2012	0	0	18	0	18	0	0
	Thryonomys_swinderianus	0	0	0	0	1	0	19				19			Leirs 1999						Olson et al. 2012	19	0	0	0	19	0	0
	Tragelaphis_spekii	0	0	0	0	1									Lahm et al. 2007			Citron,Gabon			Olivero et al. 2017	0	0	0
	Tragelaphis_spekii	0	0	0	0	1									Lahm et al. 2007			Ayina,Gabon			Olivero et al. 2017	0	0	0
	Tragelaphis_spekii	0	0	0	0	1									Lahm et al. 2007			Zambakangaka,Gabon			Olivero et al. 2017	0	0	0
	Tragelaphus_scriptus	0	0	0	0	1									Leirs et al 1999				0	1	Olson et al. 2012	0	0	1	0	1	0	0
	Tragelaphus_sp.	0	0	0	0	1									Wittmann et al 2007				0	1	Olson et al. 2012	0	0	1	0	1	1	0
	Tragelaphus_sp.	0	0	0	0	1			0	1		1			Rouquet 2005, Leroy 2004 a,b			Gabon & RoC			Olson et al. 2012	0	1	0	0	1	1	0
BOMV	Unidentified_Myonycteris/Epomophorous_bat	0	0	0	1	0			0	3		3			Goldstein, Tracey, et al. 2018			Sierra Leone				0	3	0	0	3	0	0
Ebolavirus genus	Unidentified_Myonycteris/Epomophorous_bat	0	0	0	1	0			0	3		3			Goldstein, Tracey, et al. 2018			Sierra Leone				0	3	0	0	3	0	0
universal	Unidentified_Myonycteris/Epomophorous_bat	0	0	0	1	0			0	3		3			Goldstein, Tracey, et al. 2018			Sierra Leone				0	3	0	0	3	0	0
	unspecified (Order Primates)	0	0	0	0	1									Breman et al 1999				0	12	Olson et al. 2012	0	0	12	0	12	0	0
	unspecified (Order Primates)	0	0	0	0	1	0	12				12			Breman 1999						Olson et al. 2012	12	0	0	0	12	0	0
	unspecified (Order Rodentia)	0	0	0	0	1									Breman et al 1999				0	16	Olson et al. 2012	0	0	16	0	16	0	0
	unspecified (Order Rodentia)	0	0	0	0	1									Leirs et al 1999				0	9	Olson et al. 2012	0	0	9	0	9	0	0
	unspecified (Order Rodentia)	0	0	0	0	1									Johnson 1978/Germain 1978				0	6	Olson et al. 2012	0	0	6	0	6	0	0
	unspecified (Order Rodentia)	0	0	0	0	1	0	16				16			Breman 1999						Olson et al. 2012	16	0	0	0	16	0	0
	unspecified (Order Rodentia)	0	0	0	0	1	0	25				25			Leirs 1999						Olson et al. 2012	25	0	0	0	25	0	0
	unspecified (Order Soricomorpha)	0	0	0	0	1									Leirs et al 1999				0	2	Olson et al. 2012	0	0	2	0	2	0	0

## Sheet: References
Amman, B. R., et al. (2012a), 'Seasonal pulses of Marburg virus circulation in juvenile Rousettus aegyptiacus bats coincide with periods of increased risk of human infection', Plos Pathogens, 8 (10).
Angell, Ruth L., Butlin, Roger K., and Altringham, John D. (2013), 'Sexual Segregation and Flexible Mating Patterns in Temperate Bats', Plos One, 8 (1).
Bergmans, W. (1979), 'Taxonomy and zoogeography of the fruit bats of the Peoples Republic of Congo, with notes on their reproductive biology (Mammalia, Megachiroptera)', Bijdragen Tot De Dierkunde, 48 (2), 161-86.
Berto, Alessandro, et al. "Detection of potentially novel paramyxovirus and coronavirus viral RNA in bats and rats in the Mekong Delta region of southern Viet Nam." Zoonoses and public health 65.1 (2018): 30-42.
Bradbury, J. W. (1977), 'Lek mating-behavior in hammer-headed bat', Zeitschrift fur Tierpsychologie-Journal of Comparative Ethology, 45 (3), 225-55.
Breman, J. G., et al. (1999), 'A Search for Ebola Virus in Animals in the Democratic Republic of the Congo and Cameroon: Ecologic, Virologic, and Serologic Surveys, 1979-1980', J Infect Dis, 179 Suppl 1, S137-147.
Brosset, A. and Girons, H. S. (1980), 'Breeding cycles of the microchrioptera living in caves in north eastern Gaboon', Mammalia, 44 (2), 225-32.
Caillud D, Levréro F, Cristescu R, Gatti S, Dewas M, Douadl M, Gutier-Hion A, Raymond M, Ménard N (2006) Gorilla susceptibility to Ebola virus: The cost of sociality. Current Biology 16: 489-491.
Cotterill, F. P. D. and Fergusson, R. A. (1999), 'Reproductive ecology of Commerson's leaf-nosed bats Hipposideros commersoni (Chiroptera : Hipposideridae) in South-Central Africa: interactions between seasonality and large body size; and implications for conservation ', South African Journal of Zoology, 34 (2), 53-63.
De, HM Nys, et al. "Survey of Ebola Viruses in Frugivorous and Insectivorous Bats in Guinea, Cameroon, and the Democratic Republic of the Congo, 2015-2017." Emerging infectious diseases 24.12 (2018).
Deanesly, R. (1939), 'Observations on pregnancy in the common bat (Pipistrellus pipistrellus)', Proceedings of the Zoological Society of London Series a-General and Experimental, 109, 57-U12.
Formenty P, et al. (1999) Ebola virus outbreak among wild chimpanzees living in a rain forest of Côte d'Ivoire. Journal of Infecious Diseases 179: 120-126.
Francis, C., et al. (2914), 'Pipistrellus javanicus', IUCN Red List of Threatened Species 29 May.
Furey, Neil M., Mackie, Iain J., and Racey, Paul A. (2011), 'Reproductive phenology of bat assemblages in Vietnamese karst and its conservation implications', Acta Chiropterologica, 13 (2), 341-54.
Georges A-J, Leroy EM, Renaut AA, Benissan CT, Nabias RJ, Ngoc MT, Obiang PI, Lepage JPM, Bertherat EJ, Bénoni DD, Wickings EJ, Amblard JP, Lansoud-Soukate JM, Milleliri JM, Baize S, Georges-Courbot M-C (1999) Ebola hemorrhagic fever outbreaks in Gabon, 1994-1997: Epidemiologic and health control issues. Journal of Infectious Diseases 179: 65-75.
Georges-Courbot A-J, Sánchez A, Lu C-Y, Baize S, Leroy E, Lansout-Soukate J, Tévi-Bénissan C, Georges AJ, Trappier SG, Zaki SR, Swanepoel R, Leman PA, Rollin PE, Peters CJ, Nichol ST, Ksiazek TG (1997) Isolation and phylogenetic characterization of Ebola viruses causing different outbreaks in Gabon. Emerging Infectious Diseases 3: 59-62.
Germain, M. (1978), 'Collection of mammals and arthropods during the epidemic of haemorrhagic fever in Zaire. Ebola virus haemorrhagic fever', in: Pattyn S, editor, Amsterdam, Netherlands: Elsevier/North-Holland Biomedical Press, 185-9.
Goldstein, Tracey, et al. "The discovery of Bombali virus adds further support for bats as hosts of ebolaviruses." Nature microbiology 3.10 (2018): 1084.
Gould, E. (1978), 'Rediscovery of Hipposideros ridleyi and seasonal reproduction in Malaysian bats', Biotropica, 10 (1), 30-32.
Hayman, D. T. S., et al. (2012b), 'Demography of straw-colored fruit bats in Ghana', Journal of Mammalogy, 93 (5), 1393_404.
Hayman, D. T., et al. (2010), 'Long-term survival of an urban fruit bat seropositive for Ebola and Lagos bat viruses', PLoS One, 5 (8), e11978.
Hayman, D. T., et al. (2012a), 'Ebola virus antibodies in fruit bats, Ghana, West Africa', Emerg Infect Dis, 18 (7), 1207-9.
He, Biao, Yun Feng, Hailin Zhang, Lin Xu, Weihong Yang, Yuzhen Zhang, Xingyu Li, and Changchun Tu. “Filovirus RNA in Fruit Bats, China.” Emerging Infectious Diseases 21, no. 9 (September 2015). doi:10.3201/eid2109.150260.
Heideman, P. D. (1989), 'Delayed development in Fischer pygmy fruit bat, Haplonycteris fischeri, in the Philippines', Journal of Reproduction and Fertility, 85 (2), 363-82.
Heideman, P. D. and Heaney, L. R. (1989), 'Population biology and estimates of abundance of fruit bats (Pteropodidae) in Philippine submontane rainforest', Journal of Zoology, 218, 565-86.
Heideman, P. D. and Powell, K. S. (1998), 'Age-specific reproductive strategies and delayed embryonic development in an old world fruit bat, Ptenochirus jagori', Journal of Mammalogy, 79 (1), 295-311.
Heideman, P. D. and Utzurrum, R. C. (2003a), 'Seasonality and synchrony of reproduction in three species of nectarivorous Philippines bats', BMC Ecol, 3, 11.
Heideman, Paul D. and Utzurrum, Ruth C. B. (2003b), 'Seasonality and synchrony of reproduction in three species of nectarivorous Philippines bats', BMC Ecology, 3 (11 Cited January 8, 2004).
Hickey, M. B. C. and Dunlop, J. M. (2000), 'Nycteris grandis', Mammalian Species, (632), 1-4.
Ho, Y. Y. and Lee, L. L. (2003), 'Roost selection by Formosan leaf-nosed bats (Hipposideros armiger terasensis)', Zoolog Sci, 20 (8), 1017-24.
https://www.eurekalert.org/pub_releases/2019-01/cums-sde012319.php, http://www.sciencemag.org/news/2019/01/bat-species-may-be-source-ebola-epidemic-killed-more-11000-people-west-africa, https://www.ecohealthalliance.org/2019/01/ecohealth-alliance-scientists-discover-the-deadly-zaire-ebola-virus-in-west-african-bat, https://www.washingtonpost.com/health/2019/01/24/scientists-find-deadly-ebola-viru…
Jayme, Sarah I., Hume E. Field, Carol de Jong, Kevin J. Olival, Glenn Marsh, Anson M. Tagtag, Tom Hughes, et al. “Molecular Evidence of Ebola Reston Virus Infection in Philippine Bats.” Virology Journal 12, no. 1 (July 17, 2015): 107. doi:10.1186/s12985-015-0331-3.
Jin, Longru, et al. (2010), 'Postnatal growth and age estimation in the ashy leaf-nosed bat, Hipposideros cineraceus', Acta Chiropterologica, 12 (1), 155-60.
Kemenesi, Gábor, et al. "Re-emergence of Lloviu virus in Miniopterus schreibersii bats, Hungary, 2016." Emerging microbes & infections 7.1 (2018): 66.
Krishna, A. and Dominic, C. J. (1983), 'Reproduction in the female short-nosed fruit bat Cynopterus sphinx Vahl', Periodicum Biologorum, 85 (1), 23-30.
Lahm SA, Kombila M, Swanepoel R, Barnes RFW (2007) Morbidity and mortality of wild animals in relation to outbreaks of Ebola haemorrhagic fever in Gabon, 1994-2003. Transactions of the Royal Society of Tropical Medicine and Hygiene 101: 64-78.
Laing, Eric D., et al. "Serologic evidence of fruit bat exposure to filoviruses, Singapore, 2011–2016." Emerging infectious diseases 24.1 (2018): 122.
Langevin, P. and Barclay, R. (1990), 'Hypsignathus monstrosus', Mammalian Species, 357, 1-4.
Le Guenno B (1995) Isolation and partial characterisation of a new strain of Ebola virus. The Lancet 345: 1271-1274.
Leirs, et al. (1999), 'Search for the Ebola virus reservoir in Kikwit, Democratic Republic of the Congo: reflections on a vertebrate collection', J Infect Dis, 179 Suppl 1, S155-S163.
Leroy EM, Rouquet P, Formenty P, Souquière S, Kilbourne A, Froment J-M, Bermejo M, Smit S, Karesh W, Swanepoel R, Zaki SR, Rollin PE (2004a) Multiple Ebola virus transmission events and rapid decline of Central African wildlife. Science 303: 387-390.
Leroy EM, Telfer P, Kumulungui B, Yaba P, Rouquet P, Roques P, Gonzalez J-P, Jsiazek TG, Rollin PE, Nerrienet E (2004b) A serological survey of Ebola virus infection in Central African nonhuman primates. Journal of Infectious Diseases 90: 1895-1899.
Leroy, E. M., et al. (2005), 'Fruit bats as reservoirs of Ebola virus', Nature, 438 (7068), 575-6.
Lin, A. Q., et al. (2011), 'Postnatal development in Andersen's leaf-nosed bat Hipposideros pomona: flight, wing shape, and wing bone lengths', Zoology (Jena), 114 (2), 69-77.
Lin, Ai-Qing, et al. (2010), 'Postnatal growth and age estimation in Horsfield's leaf-nosed bat Hipposideros larvatus', Zoological Studies, 49 (6), 789-96.
Medway, L. (1971), 'Observations of social and reproductive biology of bent winged bat Miniopterus australis in northern Borneo', Journal of Zoology, 165 (OCT), 261-&.
Morvan JM, Deubel V, Gounon P, Nakouné E, Barrière P, Murri S, Perpète O, Selekon B, Coudrier D, Gautier-Hion A, Colyn M, Volehkov V (1999) Identification of Ebola virus sequences present as RNA or DNA in organs of terrestrial small mammals of the Central African Republic. Microbes and Infection 1: 1193-1201.
Negredo, Ana, Gustavo Palacios, Sonia Vázquez-Morón, Félix González, Hernán Dopazo, Francisca Molero, Javier Juste, et al. “Discovery of an Ebolavirus-like Filovirus in Europe.” PLoS Pathog 7, no. 10 (2011): e1002304.
Nowak, R. M., Kunz, T. H., and Pierson, E. D. (1994), Walker's Bats of the World (Baltimore: The Johns Hopkins University Press).
Ogawa, Hirohito, Hiroko Miyamoto, Eri Nakayama, Reiko Yoshida, Ichiro Nakamura, Hirofumi Sawa, Akihiro Ishii, et al. “Seroepidemiological Prevalence of Multiple Species of Filoviruses in Fruit Bats (Eidolon Helvum) Migrating in Africa.” The Journal of Infectious Diseases 212 Suppl 2 (October 1, 2015): S101-108. doi:10.1093/infdis/jiv063.
Ogunro, B. N., et al. "Serological detection of Ebola virus exposures in native non-human primates of southern Nigeria." Journal of Epidemiology and Global Health (2018).
Okia, N. O. (1974), 'Breeding in Franquet's bat, Epomops franquetti (Tomes), in Uganda', J Mammal, 55 (2), 462-5.
Olival, K. J., et al. (2013), 'Ebola virus antibodies in fruit bats, bangladesh', Emerg Infect Dis, 19 (2), 270-3.
Pourrut X, Souris M, Towner JS, Rollin PE, Nichol ST, Gonzalez J-P, Leroy E (2009) Large serological survey showing cocirculation of Ebola and Marburg viruses in Gabonese bat populations, and a high seroprevalence of both viruses in Rousettus aegyptiacus. BMC Infectious Diseases 9: 159-169.
Pourrut, X., et al. (2007), 'Spatial and temporal patterns of Zaire ebolavirus antibody prevalence in the possible reservoir bat species', J Infect Dis, 196 Suppl 2, S176-83.
Pourrut, X., et al. (2009), 'Large serological survey showing cocirculation of Ebola and Marburg viruses in Gabonese bat populations, and a high seroprevalence of both viruses in Rousettus aegyptiacus', BMC Infect Dis, 9, 159.
Richardson, E. G. (1977), 'Biology and evolution of reproductive cycle of Miniopterus schreibersii and M australis (Chiroptera Vespertilionidae)', Journal of Zoology, 183 (NOV), 353-75.
Rossiter, S. J., et al. (2005), 'Mate fidelity and intra-lineage polygyny in greater horseshoe bats', Nature, 437 (7057), 408-11.
Saéz, A.M., et al. (2015), 'Investigating the zoonotic origin of the West African Ebola epidemic', EMBO molecular medicine, 7 (1), 17-23.
Sandhu, S. and Gopalakrishna, A. (1984), 'Some observations on the breeding biology of the Indian fruit bat, Cynopterus sphinx (Vahl) in central India', Current Science, 53 (22), 1189-92.
Swanepoel, R., et al. (2007), 'Studies of reservoir hosts for Marburg virus', Emerging Infectious Diseases, 13 (12), 1847-51.
Taniguchi, S., et al. (2011), 'Reston ebolavirus antibodies in bats, the Philippines', Emerg Infect Dis, 17 (8), 1559-60.
Thomas, D. W. and Marshall, A. G. (1984), 'Reproduction and growth in 3 species of West African fruit bats', Journal of Zoology, 202 (FEB), 265-81.
Towner, J. S., et al. (2007), 'Marburg virus infection detected in a common African bat', PLoS One, 2 (1), e764.
Towner, J. S., et al. (2009), 'Isolation of genetically diverse Marburg viruses from Egyptian fruit bats', PLoS Pathogens, 5 (7), e1000536.
Wacharapluesadee, Supaporn, Kevin J. Olival, Budsabong Kanchanasaka, Prateep Duengkae, Supakarn Kaewchot, Phimchanok Srongmongkol, Gittiyaporn Ieamsaard, et al. “Surveillance for Ebola Virus in Wildlife, Thailand.” Emerging Infectious Diseases 21, no. 12 (December 2015): 2271–73. doi:10.3201/eid2112.150860.
Wittmann TJ, Biek R, Hassanin A, Rouquet P, Reed P, Yaba P,et al. Isolates of Zaire ebolavirus from wild apes reveal geneticlineage and recombinants. Proc Natl Acad Sci USA.2007;104:17123_x0002_7.
Wright, G. S. (2009), 'Hipposideros caffer (Chiroptera: Hipposideridae)', Mammalian Species, 845, 1-9.
Yang, Xing-Lou, et al. "Genetically diverse filoviruses in Rousettus and Eonycteris spp. bats, China, 2009 and 2015." Emerging infectious diseases 23.3 (2017): 482.
Yuan, J., et al. (2012), 'Serological evidence of ebolavirus infection in bats, China', Virol J, 9, 236.
Zubaid, A. and Davison, G. W. H. (1987), 'A comparative study of the baculum in peninsular Malaysian Hipposiderines', Mammalia, 51 (1), 139-44.
